# Supplementary material for: Comparative Analyses of Chloroplast Genomes Provide Comprehensive Insights into the Adaptive Evolution of Paphiopedilum (Orchidaceae)
Source: MDPI journal article supplement (doi:10.3390/horticulturae8050391), 2022-04-28
Supplement: s1 [file s1]

Archive with 7 entries (7 files):
- figures in supplementary.pdf
- Table S1.xlsx
- Table S2.xlsx
- Table S3.xlsx
- Table S4.xlsx
- Table S5.xlsx
- Table S6.xlsx
