# Supplementary material for: Comparative Analyses of Chloroplast Genomes Provide Comprehensive Insights into the Adaptive Evolution of Paphiopedilum (Orchidaceae)
Source: MDPI journal article supplement (doi:10.3390/horticulturae8050391), 2022-04-28
Supplement: s1 [file s1 › Table S1.xlsx]

## Sheet: Table S1
Table S1. Features of the chloroplast genomes of Paphiopedilum and the related species downloaded from NCBI.
					LSC			SSC			IRa			Irb			Gene numbers
Genus	Species	Accession No.	Total Length (bp)	GC content	Length (bp)	Percentage of Length	GC content	Length (bp)	Percentage of Length	GC content	Length (bp)	Percentage of Length	GC content	Length (bp)	Percentage of Length	GC content	Gene No.	Protein-coding genes	tRNA	rRNA
Paphiopedilum	P. appletonianum	MN587755	159670	0.3535	87981	0.551018	0.3268	663	0.00415231	0.184	35513	0.222415	0.3882	35513	0.222415	0.3882	122	76	38	8
	P. appletonianum	MN587756	159029	0.3539	87891	0.5527	0.3266	924	0.0058	0.2359	35107	0.2208	0.3897	35107	0.2208	0.3897	121	75	38	8
	P. armeniacum	NC_026779	162682	0.3539	91734	0.563885	0.3252	3666	0.0225348	0.2793	33641	0.20679	0.397	33641	0.20679	0.397	123	77	38	8
	P. armeniacum	LC085347	162835	0.3539	91887	0.5643	0.3253	3666	0.0225	0.2793	33641	0.2066	0.397	33641	0.2066	0.397	114	68	38	8
	P. barbigerum *	MN315106	155965	0.3572	87701	0.5623	0.3317	3646	0.0234	0.2847	32304	0.2071	0.3958	32314	0.2072	0.3958	122	76	38	8
	P. barbigerum	MN587758	160735	0.3534	89018	0.5538	0.3267	677	0.0042	0.1905	35520	0.221	0.3884	35520	0.221	0.3884	128	82	38	8
	P. barbigerum	NC_050870	156329	0.3603	86056	0.5505	0.3356	1845	0.0118	0.2369	34214	0.2189	0.3947	34214	0.2189	0.3947	126	80	38	8
	P. bellatulum *	MN315107	156567	0.3571	88243	0.5636	0.3326	3652	0.0233	0.2883	32336	0.2065	0.3942	32336	0.2065	0.3942	122	76	38	8
	P. bellatulum	MZ150829	162065	0.3566	89814	0.5542	0.3294	1899	0.0117	0.2407	35176	0.217	0.3943	35176	0.217	0.3943	122	76	38	8
	P. concolor	MN587764	161972	0.3561	90900	0.561208	0.3283	1886	0.011644	0.2418	34593	0.213574	0.3959	34593	0.213574	0.3959	121	75	38	8
	P. concolor	MH191340	166766	0.3473	92889	0.557	0.3309	4235	0.0253949	0.2535	34821	0.208802	0.3984	34821	0.208802	0.3984	123	77	38	8
	P. dianthum	NC_036958	154699	0.3592	86861	0.561484	0.334	2416	0.0156174	0.293	32711	0.211449	0.3951	32711	0.211449	0.3951	122	76	38	8
	P. dianthum	MN587767	154710	0.3591	86872	0.5615	0.3339	2416	0.0156	0.293	32711	0.2114	0.3951	32711	0.2114	0.3951	123	76	39	8
	P. emersonii	NC_053544	162590	0.3564	87852	0.540328	0.3309	870	0.00535088	0.2172	36934	0.22716	0.3883	36934	0.22716	0.3883	127	81	38	8
	P. emersonii	MN587769	164092	0.3562	89346	0.5445	0.3312	660	0.004	0.2864	37043	0.2257	0.387	37043	0.2257	0.387	127	81	38	8
	P. ‘GZSLKY Youyou *	MN315105	160503	0.3615	91582	0.5706	0.3383	3215	0.02	0.298	32853	0.2047	0.397	32853	0.2047	0.397	122	76	38	8
	P. henryanum *	MN315108	155886	0.3589	87573	0.5618	0.3336	2831	0.0182	0.2886	32741	0.21	0.3956	32741	0.21	0.3956	121	76	37	8
	P. henryanum	MN587780	156939	0.3589	86623	0.552	0.3333	1876	0.012	0.2345	34220	0.218	0.3947	34220	0.218	0.3947	120	75	37	8
	P. henryanum	MN587781	156978	0.359	86710	0.5524	0.3334	1828	0.0116	0.2385	34220	0.218	0.3947	34220	0.218	0.3947	120	75	37	8
	P. henryanum	OK514750	157090	0.3587	86812	0.5526	0.3328	1838	0.0117	0.2367	34220	0.2178	0.3947	34220	0.2178	0.3947	118	72	38	8
	P. hirsutissimum *	MN315109	156571	0.3617	87990	0.562	0.3368	3666	0.0234	0.2951	32467	0.2074	0.3991	32448	0.2072	0.3991	121	76	37	8
	P. hirsutissimum	MN587782	154889	0.3628	85057	0.5491	0.3383	524	0.0034	0.2347	34654	0.2237	0.3938	34654	0.2237	0.3938	125	79	38	8
	P. hirsutissimum	MN587783	154878	0.3628	85062	0.5492	0.3383	524	0.0034	0.2347	34646	0.2237	0.3939	34646	0.2237	0.3939	125	79	38	8
	P. hirsutissimum	MW794130	154908	0.3628	85060	0.5491	0.3383	524	0.0034	0.2347	34665	0.2238	0.3939	34659	0.2237	0.3939	130	84	38	8
	P. hirsutissimum	NC_050871	154569	0.3627	85198	0.5512	0.3378	683	0.0044	0.287	34344	0.2222	0.3943	34344	0.2222	0.3943	125	79	38	8
	P. insigne	MN587784	157398	0.3585	87020	0.552866	0.3328	1900	0.0120713	0.2295	34239	0.217531	0.3947	34239	0.217531	0.3947	124	78	38	8
	P. malipoense	MN016934	158708	0.3601	89172	0.561862	0.3328	5916	0.037276	0.2698	31810	0.200431	0.4067	31810	0.200431	0.4067	119	74	37	8
	P. tigrinum	MN587804	152130	0.3575	85112	0.559469	0.3316	1872	0.0123053	0.2324	32573	0.214113	0.395	32573	0.214113	0.395	122	76	38	8
	P. tigrinum	NC_062049	152850	0.357	85605	0.5601	0.331	1873	0.0123	0.2322	32686	0.2138	0.3947	32686	0.2138	0.3947	117	71	38	8
	P. micranthum	NC_045278	163243	0.3576	89245	0.5467	0.3321	1742	0.0106712	0.1998	36128	0.221314	0.393	36128	0.221314	0.393	123	77	38	8
	P. micranthum	MN587791	163413	0.3574	89415	0.5472	0.3317	1742	0.0107	0.1998	36128	0.2211	0.393	36128	0.2211	0.393	123	77	38	8
	P. parishii	MW528213	154689	0.3591	86863	0.561533	0.3339	2446	0.0158124	0.2923	32690	0.211327	0.3952	32690	0.211327	0.3952	125	80	37	8
	P. parishii	MN587822	154692	0.3591	86866	0.5615	0.3339	2446	0.0158	0.2923	32690	0.2113	0.3952	32690	0.2113	0.3952	124	79	37	8
	P. purpuratum	NC_045279	158459	0.3543	88022	0.555488	0.3265	1469	0.00927054	0.2662	34484	0.217621	0.3917	34484	0.217621	0.3917	120	74	38	8
	P. venustum	MZ150831	158298	0.3542	87775	0.554492	0.3264	949	0.00599502	0.2508	34787	0.219756	0.3908	34787	0.219756	0.3908	122	76	38	8
	P. villosum	MN587810	160744	0.3534	89014	0.553763	0.3267	676	0.00420544	0.1923	35527	0.221016	0.3884	35527	0.221016	0.3884	123	77	38	8
	P. villosum var densissimum	MN587811	157305	0.3582	87265	0.5548	0.3318	1828	0.0116	0.238	34106	0.2168	0.3953	34106	0.2168	0.3953	121	75	38	8
	P. villosum var boxallii	MN587812	157292	0.3582	87252	0.5547	0.3318	1828	0.0116	0.238	34106	0.2168	0.3953	34106	0.2168	0.3953	121	75	38	8
	P. villosum var annamense	MN587813	157139	0.359	86939	0.5533	0.333	1854	0.0118	0.2357	34173	0.2175	0.3954	34173	0.2175	0.3954	121	75	38	8
	P. wardii	MN587760	158839	0.3526	88102	0.554662	0.3262	1907	0.0120059	0.2318	34415	0.216666	0.3898	34415	0.216666	0.3898	121	76	37	8
	P. wardii	MH191341	169786	0.3378	94571	0.557001	0.3309	4313	0.0254026	0.2535	35451	0.208798	0.3984	35451	0.208798	0.3984	112	69	36	7
Phragmipedium	P. besseae	NC_058206	147384	0.365	85855	0.582526	0.3393	12279	0.083313	0.2927	24625	0.167081	0.4279	24625	0.167081	0.4279	124	78	38	8
	P. kovachii	NC_058207	151238	0.3604	89326	0.590632	0.3325	13470	0.0890649	0.2831	24221	0.160152	0.4333	24221	0.160152	0.4333	123	77	38	8
Cypripedium	C. calceolus	NC_045400	175122	0.3436	97486	0.556675	0.3157	22260	0.127111	0.2613	27688	0.158107	0.4258	27688	0.158107	0.4258	133	87	38	8
	C. tibeticum	NC_053552	197815	0.3047	117193	0.592437	0.2649	25094	0.126856	0.224	27764	0.140353	0.425	27764	0.140353	0.425	133	87	38	8
Lilium	L. nepalense	NC_052789	152316	0.37	81956	0.538066	0.3482	17564	0.115313	0.306	26398	0.173311	0.4251	26398	0.173311	0.4251	130	84	38	8
	L. xanthellum	MN745202	152307	0.37	81921	0.537868	0.3485	17532	0.11511	0.3057	26427	0.173511	0.4247	26427	0.173511	0.4247	129	83	38	8
Note: 1. *present the newly sequenced samples in current study 2. Bold samples represents 19 representative species used for comparative genomic analysis 3. All individuals in this table were used for phylogenetic analysis
