# Supplementary material for: Comparative Analyses of Chloroplast Genomes Provide Comprehensive Insights into the Adaptive Evolution of Paphiopedilum (Orchidaceae)
Source: MDPI journal article supplement (doi:10.3390/horticulturae8050391), 2022-04-28
Supplement: s1 [file s1 › Table S2.xlsx]

## Sheet: Table S2
Table S2. The statistics of the codon usage and the RSCU value for each codon
		P. appletonianum	P. armeniacum	P. barbigerum	P. ‘GZSLKY’ Youyou	P. bellatulum	P. concolor	P. dianthum	P. emersonii	P. henryanum	P. hirsutissimum	P. insigne	P. malipoense	P. micranthum	P. parishii	P. purpuratum	P. tigrinum	P. venustum	P. villosum	P. wardii	Total
F	UUU	878.0 (1.30)	866.0 (1.29)	879.0(1.31)	844.0(1.27)	888.0(1.31)	872.0(1.30)	869.0(1.29)	921.0(1.29)	869.0(1.29)	854.0(1.28)	908.0(1.27)	741.0(1.25)	882.0(1.29)	898.0(1.28)	854.0(1.29)	853.0(1.29)	882.0(1.30)	901.0(1.31)	856.0(1.29)	16596.0(1.29)
	UUC	476.0 (0.70)	478.0(0.71)	467.0(0.69)	484.0(0.73)	464.0(0.69)	473.0(0.70)	477.0(0.71)	508.0(0.71)	475.0(0.71)	479.0(0.72)	517.0(0.73)	441.0(0.75)	481.0(0.71)	503.0(0.72)	475.0(0.71)	466.0(0.71)	475.0(0.70)	477.0(0.69)	473.0(0.71)	9091.0(0.71)
L	UUA	752.0 (1.90)	743.0(1.86)	744.0(1.88)	737.0(1.86)	757.0(1.91)	738.0(1.88)	745.0(1.87)	801.0(1.86)	744.0(1.88)	744.0(1.87)	773.0(1.85)	670.0(1.81)	776.0(1.90)	774.0(1.86)	726.0(1.86)	712.0(1.87)	760.0(1.90)	765.0(1.91)	736.0(1.87)	14156.0(1.87)
	UUG	513.0 (1.29)	507.0(1.27)	510.0(1.29)	517.0(1.31)	498.0(1.26)	499.0(1.27)	514.0(1.29)	531.0(1.23)	514.0(1.30)	517.0(1.30)	525.0(1.25)	475.0(1.29)	508.0(1.24)	522.0(1.25)	506.0(1.30)	490.0(1.29)	511.0(1.28)	515.0(1.28)	508.0(1.29)	9682.0(1.28)
	CUU	473.0 (1.19)	489.0(1.22)	481.0(1.21)	469.0(1.18)	478.0(1.21)	472.0(1.20)	481.0(1.21)	535.0(1.24)	472.0(1.19)	479.0(1.20)	508.0(1.21)	464.0(1.26)	498.0(1.22)	504.0(1.21)	466.0(1.20)	456.0(1.20)	474.0(1.18)	484.0(1.21)	471.0(1.20)	9143.0(1.21)
	CUC	160.0 (0.40)	164.0(0.41)	159.0(0.40)	163.0(0.41)	156.0(0.39)	162.0(0.41)	164.0(0.41)	187.0(0.43)	162.0(0.41)	161.0(0.40)	177.0(0.42)	158.0(0.43)	175.0(0.43)	179.0(0.43)	159.0(0.41)	151.0(0.40)	166.0(0.41)	161.0(0.40)	161.0(0.41)	3102.0(0.41)
	CUA	319.0 (0.80)	323.0(0.81)	315.0(0.79)	320.0(0.81)	328.0(0.83)	318.0(0.81)	323.0(0.81)	355.0(0.82)	313.0(0.79)	318.0(0.80)	354.0(0.85)	288.0(0.78)	326.0(0.80)	344.0(0.83)	319.0(0.82)	306.0(0.81)	321.0(0.80)	320.0(0.80)	315.0(0.80)	6087.0(0.81)
	CUG	162.0 (0.41)	170.0(0.43)	169.0(0.43)	169.0(0.43)	163.0(0.41)	171.0(0.43)	168.0(0.42)	175.0(0.41)	168.0(0.42)	169.0(0.42)	175.0(0.42)	160.0(0.43)	170.0(0.42)	174.0(0.42)	161.0(0.41)	165.0(0.43)	169.0(0.42)	164.0(0.41)	168.0(0.43)	3189.0(0.42)
I	AUU	973.0 (1.46)	982.0(1.47)	967.0(1.45)	953.0(1.44)	991.0(1.48)	965.0(1.47)	972.0(1.47)	1045.0(1.47)	973.0(1.46)	953.0(1.44)	1033.0(1.46)	883.0(1.46)	996.0(1.46)	1008.0(1.45)	959.0(1.46)	944.0(1.46)	985.0(1.46)	985.0(1.46)	968.0(1.46)	18452.0(1.46)
	AUC	387.0 (0.58)	379.0(0.57)	384.0(0.58)	390.0(0.59)	370.0(0.55)	371.0(0.57)	382.0(0.58)	410.0(0.58)	383.0(0.57)	393.0(0.59)	413.0(0.58)	364.0(0.60)	392.0(0.57)	409.0(0.59)	379.0(0.58)	374.0(0.58)	386.0(0.57)	390.0(0.58)	382.0(0.58)	7380.0(0.58)
	AUA	640.0 (0.96)	641.0(0.96)	643.0(0.97)	640.0(0.97)	654.0(0.97)	631.0(0.96)	629.0(0.95)	678.0(0.95)	648.0(0.97)	641.0(0.97)	678.0(0.96)	573.0(0.94)	661.0(0.97)	663.0(0.96)	627.0(0.96)	626.0(0.97)	649.0(0.96)	655.0(0.97)	638.0(0.96)	12131.0(0.96)
M	AUG	564.0(1.00)	560.0(1.00)	563.0(1.00)	566.0(1.00)	562.0(1.00)	560.0(1.00)	558.0(1.00)	595.0(1.00)	560.0(1.00)	566.0(1.00)	593.0(1.00)	505.0(1.00)	571.0(1.00)	582.0(1.00)	553.0(1.00)	557.0(1.00)	566.0(1.00)	572.0(1.00)	557.0(1.00)	10646.0(1.00)
V	GUU	446.0(1.44)	439.0(1.41)	451.0(1.44)	447.0(1.42)	446.0(1.43)	454.0(1.44)	447.0(1.42)	468.0(1.41)	446.0(1.42)	448.0(1.42)	467.0(1.43)	424.0(1.43)	452.0(1.42)	451.0(1.40)	440.0(1.43)	433.0(1.42)	452.0(1.43)	456.0(1.43)	447.0(1.43)	8488.0(1.43)
	GUC	156.0(0.50)	152.0(0.49)	156.0(0.50)	162.0(0.51)	150.0(0.48)	151.0(0.48)	155.0(0.49)	161.0(0.49)	161.0(0.51)	160.0(0.51)	162.0(0.49)	137.0(0.46)	154.0(0.48)	155.0(0.48)	153.0(0.50)	154.0(0.50)	160.0(0.50)	161.0(0.50)	156.0(0.50)	2938.0(0.49)
	GUA	444.0(1.43)	462.0(1.48)	456.0(1.45)	456.0(1.45)	457.0(1.46)	456.0(1.44)	463.0(1.47)	487.0(1.47)	457.0(1.45)	458.0(1.45)	484.0(1.48)	436.0(1.47)	465.0(1.46)	482.0(1.50)	445.0(1.44)	453.0(1.48)	455.0(1.44)	464.0(1.45)	449.0(1.44)	8658.0(1.46)
	GUG	197.0(0.63)	196.0(0.63)	192.0(0.61)	196.0(0.62)	197.0(0.63)	203.0(0.64)	194.0(0.62)	208.0(0.63)	193.0(0.61)	198.0(0.63)	197.0(0.60)	190.0(0.64)	206.0(0.65)	200.0(0.62)	197.0(0.64)	181.0(0.59)	201.0(0.63)	196.0(0.61)	195.0(0.63)	3689.0(0.62)
S	UCU	556.0(1.74)	532.0(1.69)	545.0(1.76)	537.0(1.72)	547.0(1.73)	546.0(1.73)	554.0(1.76)	558.0(1.67)	546.0(1.75)	542.0(1.72)	579.0(1.76)	486.0(1.70)	543.0(1.68)	583.0(1.77)	542.0(1.73)	526.0(1.73)	553.0(1.73)	562.0(1.77)	541.0(1.73)	10342.0(1.71)
	UCC	329.0(1.03)	331.0(1.05)	312.0(1.01)	329.0(1.05)	320.0(1.01)	331.0(1.05)	323.0(1.02)	351.0(1.05)	308.0(0.99)	333.0(1.06)	331.0(1.00)	308.0(1.08)	344.0(1.07)	335.0(1.02)	327.0(1.05)	311.0(1.02)	330.0(1.03)	313.0(0.99)	329.0(1.05)	6238.0(1.03)
	UCA	393.0(1.23)	383.0(1.22)	388.0(1.25)	386.0(1.23)	397.0(1.26)	386.0(1.22)	387.0(1.23)	421.0(1.26)	391.0(1.26)	388.0(1.23)	420.0(1.27)	337.0(1.18)	394.0(1.22)	403.0(1.22)	385.0(1.23)	383.0(1.26)	400.0(1.25)	400.0(1.26)	387.0(1.24)	7458.0(1.24)
	UCG	153.0(0.48)	154.0(0.49)	144.0(0.47)	151.0(0.48)	146.0(0.46)	149.0(0.47)	151.0(0.48)	163.0(0.49)	147.0(0.47)	149.0(0.47)	154.0(0.47)	137.0(0.48)	158.0(0.49)	155.0(0.47)	150.0(0.48)	142.0(0.47)	152.0(0.47)	147.0(0.46)	148.0(0.47)	2932.0(0.49)
	AGU	374.0(1.17)	373.0(1.19)	366.0(1.18)	372.0(1.19)	380.0(1.21)	376.0(1.19)	372.0(1.18)	383.0(1.15)	373.0(1.20)	370.0(1.18)	379.0(1.15)	339.0(1.19)	377.0(1.17)	386.0(1.17)	370.0(1.18)	358.0(1.18)	377.0(1.18)	375.0(1.18)	364.0(1.16)	7096.0(1.18)
	AGC	107.0(0.34)	111.0(0.35)	103.0(0.33)	102.0(0.33)	102.0(0.32)	106.0(0.34)	106.0(0.34)	128.0(0.38)	102.0(0.33)	104.0(0.33)	115.0(0.35)	108.0(0.38)	118.0(0.37)	114.0(0.35)	103.0(0.33)	101.0(0.33)	109.0(0.34)	109.0(0.34)	106.0(0.34)	2128.0(0.35)
P	CCU	359.0(1.53)	355.0(1.50)	360.0(1.51)	364.0(1.51)	366.0(1.54)	368.0(1.54)	366.0(1.51)	379.0(1.53)	364.0(1.52)	364.0(1.51)	379.0(1.53)	337.0(1.50)	364.0(1.53)	380.0(1.53)	359.0(1.54)	352.0(1.52)	367.0(1.54)	361.0(1.49)	367.0(1.56)	6824.0(1.51)
	CCC	214.0(0.91)	219.0(0.93)	219.0(0.92)	222.0(0.92)	218.0(0.92)	214.0(0.89)	222.0(0.92)	226.0(0.91)	220.0(0.92)	222.0(0.92)	223.0(0.90)	213.0(0.95)	220.0(0.92)	222.0(0.89)	213.0(0.91)	213.0(0.92)	214.0(0.90)	220.0(0.91)	211.0(0.89)	4133.0(0.91)
	CCA	263.0(1.12)	268.0(1.13)	272.0(1.14)	273.0(1.14)	271.0(1.14)	270.0(1.13)	274.0(1.13)	276.0(1.12)	271.0(1.13)	277.0(1.15)	285.0(1.15)	244.0(1.08)	265.0(1.11)	283.0(1.14)	260.0(1.11)	260.0(1.12)	264.0(1.11)	278.0(1.15)	262.0(1.11)	5134.0(1.13)
	CCG	101.0(0.43)	105.0(0.44)	105.0(0.44)	103.0(0.43)	94.0(0.40)	105.0(0.44)	106.0(0.44)	108.0(0.44)	104.0(0.43)	103.0(0.43)	106.0(0.43)	107.0(0.48)	105.0(0.44)	108.0(0.44)	102.0(0.44)	104.0(0.45)	106.0(0.45)	107.0(0.44)	104.0(0.44)	2009.0(0.44)
T	ACU	462.0(1.57)	460.0(1.58)	453.0(1.57)	466.0(1.60)	464.0(1.60)	468.0(1.59)	465.0(1.58)	489.0(1.58)	461.0(1.58)	469.0(1.59)	486.0(1.57)	432.0(1.60)	472.0(1.59)	485.0(1.59)	459.0(1.57)	448.0(1.56)	464.0(1.56)	464.0(1.56)	457.0(1.56)	8816.0(1.58)
	ACC	218.0(0.74)	213.0(0.73)	216.0(0.75)	215.0(0.74)	206.0(0.71)	212.0(0.72)	209.0(0.71)	227.0(0.73)	217.0(0.74)	217.0(0.74)	224.0(0.72)	195.0(0.72)	221.0(0.74)	218.0(0.71)	214.0(0.73)	211.0(0.73)	224.0(0.75)	223.0(0.75)	219.0(0.75)	4104.0(0.73)
	ACA	365.0(1.24)	362.0(1.24)	358.0(1.24)	361.0(1.24)	365.0(1.26)	358.0(1.22)	374.0(1.27)	377.0(1.22)	362.0(1.24)	362.0(1.23)	381.0(1.23)	332.0(1.23)	361.0(1.21)	383.0(1.25)	363.0(1.24)	357.0(1.24)	372.0(1.25)	370.0(1.24)	365.0(1.25)	6918.0(1.24)
	ACG	135.0(0.46)	131.0(0.45)	129.0(0.45)	125.0(0.43)	123.0(0.42)	136.0(0.46)	130.0(0.44)	145.0(0.47)	129.0(0.44)	129.0(0.44)	146.0(0.47)	120.0(0.44)	135.0(0.45)	136.0(0.45)	134.0(0.46)	133.0(0.46)	132.0(0.44)	133.0(0.45)	130.0(0.44)	2522.0(0.45)
A	GCU	526.0(1.77)	531.0(1.79)	528.0(1.78)	534.0(1.79)	521.0(1.80)	536.0(1.80)	532.0(1.77)	571.0(1.78)	531.0(1.78)	532.0(1.78)	560.0(1.78)	520.0(1.79)	544.0(1.77)	550.0(1.78)	522.0(1.78)	502.0(1.74)	538.0(1.78)	536.0(1.77)	531.0(1.79)	10099.0(1.78)
	GCC	166.0(0.56)	165.0(0.56)	161.0(0.54)	161.0(0.54)	169.0(0.58)	167.0(0.56)	168.0(0.56)	176.0(0.55)	161.0(0.54)	167.0(0.56)	174.0(0.55)	165.0(0.57)	168.0(0.55)	172.0(0.56)	165.0(0.56)	161.0(0.56)	164.0(0.54)	167.0(0.55)	163.0(0.55)	3120.0(0.55)
	GCA	375.0(1.26)	373.0(1.26)	377.0(1.27)	377.0(1.27)	362.0(1.25)	372.0(1.25)	385.0(1.28)	414.0(1.29)	382.0(1.28)	379.0(1.27)	396.0(1.26)	364.0(1.25)	395.0(1.29)	388.0(1.26)	363.0(1.24)	371.0(1.29)	383.0(1.27)	389.0(1.28)	373.0(1.26)	7139.0(1.26)
	GCG	120.0(0.40)	117.0(0.39)	121.0(0.41)	120.0(0.40)	108.0(0.37)	117.0(0.39)	119.0(0.40)	121.0(0.38)	121.0(0.41)	120.0(0.40)	130.0(0.41)	115.0(0.40)	119.0(0.39)	124.0(0.40)	120.0(0.41)	118.0(0.41)	121.0(0.40)	122.0(0.40)	121.0(0.41)	2274.0(0.40)
Y	UAU	682.0(1.59)	675.0(1.58)	670.0(1.58)	673.0(1.59)	702.0(1.59)	682.0(1.59)	664.0(1.58)	725.0(1.60)	671.0(1.58)	680.0(1.59)	704.0(1.57)	608.0(1.58)	697.0(1.59)	678.0(1.59)	665.0(1.58)	646.0(1.58)	688.0(1.59)	680.0(1.59)	676.0(1.58)	12931.0(1.58)
	UAC	175.0(0.41)	178.0(0.42)	179.0(0.42)	175.0(0.41)	180.0(0.41)	178.0(0.41)	175.0(0.42)	184.0(0.40)	180.0(0.42)	176.0(0.41)	193.0(0.43)	160.0(0.42)	179.0(0.41)	177.0(0.41)	176.0(0.42)	174.0(0.42)	177.0(0.41)	178.0(0.41)	177.0(0.42)	3422.0(0.42)
termination codon	UAA	32.0(1.26)	40.0(1.46)	36.0(1.42)	37.0(1.46)	37.0(1.46)	34.0(1.36)	37.0(1.46)	39.0(1.44)	36.0(1.42)	37.0(1.46)	36.0(1.38)	33.0(1.34)	33.0(1.29)	37.0(1.39)	32.0(1.30)	39.0(1.54)	35.0(1.38)	36.0(1.40)	33.0(1.30)	834.0(1.46)
	UAG	22.0(0.87)	20.0(0.73)	22.0(0.87)	21.0(0.83)	20.0(0.79)	21.0(0.84)	21.0(0.83)	22.0(0.81)	21.0(0.83)	21.0(0.83)	23.0(0.88)	23.0(0.93)	22.0(0.86)	24.0(0.90)	22.0(0.89)	19.0(0.75)	20.0(0.79)	21.0(0.82)	23.0(0.91)	451.0(0.79)
	UGA	22.0(0.87)	22.0(0.80)	18.0(0.71)	18.0(0.71)	19.0(0.75)	20.0(0.80)	18.0(0.71)	20.0(0.74)	19.0(0.75)	18.0(0.71)	19.0(0.73)	18.0(0.73)	22.0(0.86)	19.0(0.71)	20.0(0.81)	18.0(0.71)	21.0(0.83)	20.0(0.78)	20.0(0.79)	423.0(0.74)
H	CAU	500.0(1.59)	518.0(1.59)	496.0(1.58)	493.0(1.58)	489.0(1.59)	496.0(1.58)	501.0(1.59)	532.0(1.61)	494.0(1.59)	492.0(1.57)	521.0(1.60)	462.0(1.58)	517.0(1.60)	512.0(1.59)	493.0(1.59)	492.0(1.58)	504.0(1.58)	511.0(1.59)	496.0(1.58)	9469.0(1.58)
	CAC	130.0(0.41)	134.0(0.41)	130.0(0.42)	133.0(0.42)	128.0(0.41)	133.0(0.42)	129.0(0.41)	130.0(0.39)	129.0(0.41)	135.0(0.43)	132.0(0.40)	122.0(0.42)	131.0(0.40)	132.0(0.41)	129.0(0.41)	129.0(0.42)	135.0(0.42)	133.0(0.41)	133.0(0.42)	2506.0(0.42)
Q	CAA	685.0(1.54)	693.0(1.54)	682.0(1.54)	697.0(1.56)	692.0(1.54)	680.0(1.54)	703.0(1.55)	703.0(1.53)	690.0(1.55)	713.0(1.56)	710.0(1.54)	617.0(1.51)	695.0(1.53)	718.0(1.55)	679.0(1.54)	666.0(1.55)	692.0(1.54)	692.0(1.55)	688.0(1.54)	13114.0(1.54)
	CAG	206.0(0.46)	209.0(0.46)	201.0(0.46)	198.0(0.44)	206.0(0.46)	204.0(0.46)	203.0(0.45)	218.0(0.47)	202.0(0.45)	201.0(0.44)	210.0(0.46)	199.0(0.49)	214.0(0.47)	209.0(0.45)	203.0(0.46)	193.0(0.45)	205.0(0.46)	202.0(0.45)	203.0(0.46)	3893.0(0.46)
N	AAU	977.0(1.56)	982.0(1.56)	959.0(1.57)	963.0(1.57)	978.0(1.58)	963.0(1.56)	963.0(1.56)	1017.0(1.54)	959.0(1.56)	949.0(1.56)	1000.0(1.55)	850.0(1.55)	998.0(1.55)	983.0(1.55)	967.0(1.56)	940.0(1.56)	980.0(1.55)	990.0(1.57)	963.0(1.55)	18410.0(1.56)
	AAC	277.0(0.44)	274.0(0.44)	264.0(0.43)	261.0(0.43)	260.0(0.42)	270.0(0.44)	269.0(0.44)	300.0(0.46)	268.0(0.44)	268.0(0.44)	290.0(0.45)	250.0(0.45)	289.0(0.45)	288.0(0.45)	274.0(0.44)	268.0(0.44)	284.0(0.45)	275.0(0.43)	279.0(0.45)	5194.0(0.44)
K	AAA	1116.0(1.46)	1126.0(1.47)	1121.0(1.46)	1095.0(1.43)	1107.0(1.45)	1093.0(1.44)	1102.0(1.45)	1165.0(1.48)	1129.0(1.46)	1112.0(1.45)	1152.0(1.47)	936.0(1.45)	1129.0(1.47)	1107.0(1.45)	1102.0(1.46)	1096.0(1.46)	1111.0(1.45)	1143.0(1.46)	1096.0(1.45)	21000.0(1.46)
	AAG	415.0(0.54)	408.0(0.53)	413.0(0.54)	436.0(0.57)	419.0(0.55)	423.0(0.56)	416.0(0.55)	410.0(0.52)	413.0(0.54)	417.0(0.55)	419.0(0.53)	351.0(0.55)	410.0(0.53)	423.0(0.55)	409.0(0.54)	407.0(0.54)	418.0(0.55)	418.0(0.54)	420.0(0.55)	7860.0(0.54)
D	GAU	831.0(1.64)	850.0(1.63)	845.0(1.64)	842.0(1.65)	862.0(1.65)	853.0(1.64)	842.0(1.63)	882.0(1.64)	861.0(1.64)	845.0(1.65)	872.0(1.63)	789.0(1.64)	868.0(1.64)	860.0(1.64)	835.0(1.64)	824.0(1.64)	852.0(1.64)	847.0(1.64)	847.0(1.64)	16086.0(1.64)
	GAC	181.0(0.36)	193.0(0.37)	188.0(0.36)	178.0(0.35)	180.0(0.35)	190.0(0.36)	188.0(0.37)	191.0(0.36)	186.0(0.36)	182.0(0.35)	195.0(0.37)	175.0(0.36)	189.0(0.36)	189.0(0.36)	181.0(0.36)	183.0(0.36)	185.0(0.36)	189.0(0.36)	183.0(0.36)	3546.0(0.36)
E	GAA	1032.0(1.48)	1040.0(1.48)	1042.0(1.44)	1030.0(1.45)	1015.0(1.48)	1037.0(1.48)	1030.0(1.47)	1082.0(1.48)	1017.0(1.43)	1054.0(1.44)	1069.0(1.43)	898.0(1.44)	1046.0(1.47)	1055.0(1.47)	1024.0(1.47)	993.0(1.43)	1045.0(1.47)	1055.0(1.43)	1037.0(1.47)	19566.0(1.46)
	GAG	367.0(0.52)	363.0(0.52)	408.0(0.56)	389.0(0.55)	361.0(0.52)	360.0(0.52)	374.0(0.53)	383.0(0.52)	406.0(0.57)	410.0(0.56)	421.0(0.57)	345.0(0.56)	374.0(0.53)	382.0(0.53)	366.0(0.53)	396.0(0.57)	377.0(0.53)	418.0(0.57)	374.0(0.53)	7260.0(0.54)
C	UGU	200.0(1.39)	213.0(1.45)	197.0(1.40)	194.0(1.40)	201.0(1.41)	203.0(1.41)	202.0(1.42)	226.0(1.45)	199.0(1.41)	198.0(1.38)	214.0(1.42)	188.0(1.45)	214.0(1.45)	218.0(1.44)	200.0(1.40)	183.0(1.39)	199.0(1.38)	197.0(1.39)	200.0(1.40)	3870.0(1.40)
	UGC	87.0(0.61)	81.0(0.55)	84.0(0.60)	83.0(0.60)	84.0(0.59)	85.0(0.59)	83.0(0.58)	85.0(0.55)	84.0(0.59)	89.0(0.62)	88.0(0.58)	71.0(0.55)	82.0(0.55)	85.0(0.56)	85.0(0.60)	80.0(0.61)	89.0(0.62)	86.0(0.61)	86.0(0.60)	1644.0(0.60)
W	UGG	415.0(1.00)	416.0(1.00)	410.0(1.00)	414.0(1.00)	403.0(1.00)	405.0(1.00)	414.0(1.00)	442.0(1.00)	407.0(1.00)	412.0(1.00)	431.0(1.00)	373.0(1.00)	426.0(1.00)	424.0(1.00)	403.0(1.00)	396.0(1.00)	417.0(1.00)	421.0(1.00)	409.0(1.00)	7945.0(1.00)
R	CGU	341.0(1.33)	310.0(1.22)	336.0(1.30)	334.0(1.27)	324.0(1.27)	336.0(1.30)	338.0(1.29)	341.0(1.29)	336.0(1.30)	338.0(1.29)	348.0(1.31)	311.0(1.30)	331.0(1.27)	338.0(1.28)	337.0(1.32)	330.0(1.32)	339.0(1.31)	342.0(1.31)	334.0(1.29)	6242.0(1.27)
	CGC	88.0(0.34)	90.0(0.36)	92.0(0.36)	90.0(0.34)	86.0(0.34)	90.0(0.35)	94.0(0.36)	93.0(0.35)	92.0(0.36)	92.0(0.35)	94.0(0.35)	88.0(0.37)	94.0(0.36)	94.0(0.36)	89.0(0.35)	91.0(0.36)	92.0(0.35)	94.0(0.36)	92.0(0.36)	1783.0(0.36)
	CGA	349.0(1.36)	342.0(1.35)	348.0(1.35)	355.0(1.35)	347.0(1.36)	355.0(1.37)	359.0(1.37)	353.0(1.33)	351.0(1.36)	355.0(1.36)	356.0(1.34)	317.0(1.33)	347.0(1.33)	365.0(1.38)	347.0(1.36)	333.0(1.33)	357.0(1.38)	352.0(1.35)	355.0(1.38)	6670.0(1.36)
	CGG	100.0(0.39)	103.0(0.41)	102.0(0.40)	105.0(0.40)	101.0(0.39)	99.0(0.38)	100.0(0.38)	106.0(0.40)	103.0(0.40)	101.0(0.39)	105.0(0.40)	101.0(0.42)	105.0(0.40)	102.0(0.39)	100.0(0.39)	98.0(0.39)	102.0(0.39)	102.0(0.39)	103.0(0.40)	1957.0(0.40)
	AGA	506.0(1.97)	511.0(2.02)	506.0(1.96)	511.0(1.94)	518.0(2.02)	514.0(1.98)	510.0(1.95)	526.0(1.98)	507.0(1.96)	518.0(1.98)	524.0(1.98)	462.0(1.94)	515.0(1.97)	521.0(1.97)	505.0(1.97)	494.0(1.98)	504.0(1.94)	514.0(1.97)	506.0(1.96)	9641.0(1.96)
	AGG	159.0(0.62)	165.0(0.65)	162.0(0.63)	186.0(0.71)	159.0(0.62)	160.0(0.62)	166.0(0.64)	172.0(0.65)	163.0(0.63)	163.0(0.62)	162.0(0.61)	153.0(0.64)	173.0(0.66)	166.0(0.63)	157.0(0.61)	154.0(0.62)	162.0(0.62)	162.0(0.62)	159.0(0.62)	3160.0(0.64)
G	GGU	497.0(1.31)	486.0(1.28)	500.0(1.31)	499.0(1.31)	492.0(1.31)	488.0(1.28)	506.0(1.32)	506.0(1.27)	505.0(1.32)	502.0(1.31)	519.0(1.30)	475.0(1.30)	491.0(1.27)	522.0(1.31)	492.0(1.31)	488.0(1.32)	494.0(1.29)	500.0(1.30)	490.0(1.29)	9366.0(1.29)
	GGC	149.0(0.39)	152.0(0.40)	150.0(0.39)	149.0(0.39)	152.0(0.40)	152.0(0.40)	151.0(0.39)	164.0(0.41)	151.0(0.39)	152.0(0.40)	152.0(0.38)	152.0(0.41)	155.0(0.40)	155.0(0.39)	145.0(0.39)	145.0(0.39)	151.0(0.39)	152.0(0.39)	148.0(0.39)	2878.0(0.40)
	GGA	586.0(1.54)	587.0(1.55)	588.0(1.54)	591.0(1.56)	582.0(1.54)	600.0(1.58)	595.0(1.55)	631.0(1.58)	589.0(1.54)	593.0(1.55)	627.0(1.57)	566.0(1.54)	605.0(1.57)	616.0(1.55)	586.0(1.56)	579.0(1.56)	603.0(1.57)	597.0(1.55)	596.0(1.57)	11260.0(1.56)
	GGG	286.0(0.75)	289.0(0.76)	287.0(0.75)	281.0(0.74)	281.0(0.75)	281.0(0.74)	286.0(0.74)	299.0(0.75)	285.0(0.75)	280.0(0.73)	300.0(0.75)	274.0(0.75)	294.0(0.76)	296.0(0.75)	282.0(0.75)	269.0(0.73)	285.0(0.74)	291.0(0.76)	287.0(0.75)	5455.0(0.75)
Average codons		24169	24204	24129	24142	24103	24118	24223	25525	24181	24268	25318	22135	24661	24968	23875	23495	24405	24560	24071	460550
