# Supplementary material for: Comparative Analyses of Chloroplast Genomes Provide Comprehensive Insights into the Adaptive Evolution of Paphiopedilum (Orchidaceae)
Source: MDPI journal article supplement (doi:10.3390/horticulturae8050391), 2022-04-28
Supplement: s1 [file s1 › Table S3.xlsx]

## Sheet: Table S3
Table S3. The special initiation codon of Paphiopedilum chloroplast genome in protein coding genes
	cemA	ycf1	rps19	rpl2	psaC	petN	rpl32
Paphiopedilum_bellatulum	*	AUG	CUG	UUG	UUG	AUG	AUG
Paphiopedilum wardii	*	AUG	AUG	ACG	AUG	AUG	AUG
Paphiopedilum_venustum	*	AUG	GUG	ACG	AUG	AUU	AUG
Paphiopedilum_dianthum	*	AUG	GUG	ACG	AUG	AUG	AUG
Paphiopedilum_parishii	UUG	AUG	GUG	AUA	AUG	AUG	AUG
Paphiopedilum_barbigerum	*	AUG	AUG	UUG	AUG	AUG	AUG
Paphiopedilum_tigrinum	*	AUG	AUG	ACG	AUG	AUG	AUG
Paphiopedilum_purpuratum	*	AUG	GUG	ACG	AUG	AUU	AUG
Paphiopedilum_appletonianum	*	AUG	AUG	ACG	AUG	AUG	AUG
Paphiopedilum_villosumvillosum	*	AUG	AUG	ACG	AUG	AUG	AUG
Paphiopedilum_malipoense	AUG	CUG	GUG	ACG	AUG	AUU	AUC
Paphiopedilum_concolor	*	AUG	GUG	ACG	AUG	AUG	AUG
Paphiopedilum_insigne	AUG	AUG	AUG	ACG	AUG	AUG	AUG
Paphiopedilum_henryanum	*	AUG	AUG	UUG	AUG	AUG	AUG
Paphiopedilum_armeniacum	AUG	AUU	GUG	ACG	AUG	AUU	AUG
Paphiopedilum_hirsutissimum	*	AUG	AUG	AUG	AUG	AUG	AUG
Paphiopedilum_micranthum	AUG	AUG	GUG	ACG	AUG	AUU	AUG
Paphiopedilum_emersonii	AUG	AUG	GUG	ACG	AUG	AUU	AUG
Paphiopedilum_GZSLKY_Youyou	*	AUG	AUG	UUG	AUG	AUG	AUG
* represented missing or pseudogenes
