# Supplementary material for: Comparative Analyses of Chloroplast Genomes Provide Comprehensive Insights into the Adaptive Evolution of Paphiopedilum (Orchidaceae)
Source: MDPI journal article supplement (doi:10.3390/horticulturae8050391), 2022-04-28
Supplement: s1 [file s1 › Table S4.xlsx]

## Sheet: Table S4
Table S4. The hits numbers of homologous fragments between the chloroplast genomes and nuclear genome in Paphiopedilum.
	Total	Chr1	Chr2	Chr3	Chr4	Chr5	Chr6	Chr7	Chr8	Chr9	Chr10	Chr11	Chr12	Chr13	Chr14	Chr15	Chr16	Chr17	Chr18	Chr19
Paphiopedilum_bellatulum	1429	53	47	18	123	36	96	45	40	75	48	36	100	122	68	107	164	62	77	112
Paphiopedilum wardii	1440	51	46	23	141	37	104	43	44	76	50	36	100	122	63	103	158	62	71	110
Paphiopedilum_venustum	1440	51	46	21	141	38	104	43	43	76	48	36	102	121	65	103	160	61	72	109
Paphiopedilum_dianthum	1444	53	45	20	131	36	104	45	44	73	49	34	105	121	63	112	159	62	73	115
Paphiopedilum_parishii	1444	53	45	20	131	36	104	45	44	73	48	34	105	120	63	112	161	62	73	115
Paphiopedilum_barbigerum	1445	54	47	25	130	38	102	45	44	75	49	38	97	118	67	109	163	64	68	112
Paphiopedilum_tigrinum	1449	52	44	25	138	37	102	46	44	77	49	33	99	119	67	103	159	61	75	119
Paphiopedilum_purpuratum	1457	55	48	23	140	38	106	43	41	77	50	38	103	123	59	103	160	63	71	116
Paphiopedilum_appletonianum	1463	55	48	23	144	38	106	43	43	75	49	38	101	125	59	102	164	65	71	114
Paphiopedilum_villosumvillosum	1471	55	46	24	144	37	102	46	45	76	51	39	100	124	63	104	165	66	70	114
Paphiopedilum_malipoense	1473	54	48	21	129	36	103	43	43	82	53	42	109	123	59	121	155	61	75	116
Paphiopedilum_concolor	1484	55	48	22	141	37	100	44	43	78	50	37	106	129	67	114	162	60	79	112
Paphiopedilum_insigne	1487	55	48	25	141	37	104	46	44	79	51	37	101	126	65	106	164	66	72	120
Paphiopedilum_henryanum	1488	55	46	19	136	37	105	45	44	77	51	39	100	118	68	111	173	64	78	122
Paphiopedilum_armeniacum	1490	54	46	20	125	37	104	44	43	83	49	42	111	129	63	123	159	64	80	114
Paphiopedilum_hirsutissimum	1497	54	48	18	140	39	108	48	45	76	55	34	107	126	61	108	166	65	78	121
Paphiopedilum_micranthum	1502	56	48	21	135	36	102	46	43	84	53	42	109	129	61	121	160	62	78	116
Paphiopedilum_emersonii	1503	55	48	21	138	35	104	46	43	85	54	43	108	127	56	122	161	62	78	117
Paphiopedilum_GZSLKY_Youyou	1525	54	48	24	141	38	109	48	45	78	56	37	108	128	61	113	169	67	77	124
Total	27931	1024	890	413	2589	703	1969	854	825	1475	963	715	1971	2350	1198	2097	3082	1199	1416	2198
