# Supplementary material for: Comparative Analyses of Chloroplast Genomes Provide Comprehensive Insights into the Adaptive Evolution of Paphiopedilum (Orchidaceae)
Source: MDPI journal article supplement (doi:10.3390/horticulturae8050391), 2022-04-28
Supplement: s1 [file s1 › Table S5.xlsx]

## Sheet: Table S5
Table S5. The selective pressure analysis at species level among Paphiopedilum.
Sequence	Method	Ka	Ks	Ka/Ks	P-Value(Fisher)	Length	S-Sites	N-Sites	Fold-Sites(0:2:4)	Substitutions	S-Substitutions	N-Substitutions	Fold-S-Substitutions(0:2:4)	Fold-N-Substitutions(0:2:4)	Divergence-Time	Substitution-Rate-Ratio(rTC:rAG:rTA:rCG:rTG:rCA/rCA)	GC(1:2:3)	ML-Score	AICc	Akaike-Weight	Model
P. appletonianum & P. armeniacum	YN	0.00803087	0.0193725	0.41455	1.63742e-22	51318	12025.5	39292.5	NA	543	229.281	313.719	NA	NA	0.0106886	4.64758:4.64758:1:1:1:1	0.364548(0.444346:0.366092:0.283207)	NA	NA	NA	NA
P. appletonianum & P. barbigerum	YN	0.00329063	0.00651183	0.505331	6.98019e-06	51765	10966.5	40798.5	NA	205	71.0477	133.952	NA	NA	0.00397304	2.23578:2.23578:1:1:1:1	0.367293(0.448006:0.368449:0.285425)	NA	NA	NA	NA
P. appletonianum & P. ‘GZSLKY Youyou	YN	0.00505726	0.0112305	0.450316	4.55382e-11	51768	10356.2	41411.8	NA	324	115.283	208.717	NA	NA	0.0062922	1.53732:1.53732:1:1:1:1	0.367876(0.447757:0.369558:0.286312)	NA	NA	NA	NA
P. appletonianum & P. bellatulum	YN	0.0107333	0.0187658	0.571958	1.68668e-10	51573	11557	40016	NA	640	213.699	426.301	NA	NA	0.0125333	3.35586:3.35586:1:1:1:1	0.365038(0.4449:0.367312:0.282902)	NA	NA	NA	NA
P. appletonianum & P. concolor	YN	0.00391948	0.0100341	0.390615	2.45274e-13	52002	11534.7	40467.3	NA	273	114.816	158.184	NA	NA	0.00527579	3.04574:3.04574:1:1:1:1	0.367432(0.44784:0.369558:0.284898)	NA	NA	NA	NA
P. appletonianum & P. dianthum	YN	0.0044155	0.00783206	0.563772	2.22321e-05	51960	11009.5	40950.5	NA	266	85.7237	180.276	NA	NA	0.00513941	2.21262:2.21262:1:1:1:1	0.368162(0.448561:0.370251:0.285675)	NA	NA	NA	NA
P. appletonianum & P. emersonii	YN	0.00895928	0.0224435	0.399193	6.91391e-28	52125	12276.8	39848.2	NA	625	270.301	354.699	NA	NA	0.0121351	4.70175:4.70175:1:1:1:1	0.36795(0.448644:0.369253:0.285952)	NA	NA	NA	NA
P. appletonianum & P. henryanum	YN	0.00412158	0.00685602	0.601162	0.000312819	51822	10704.8	41117.2	NA	242	73.0033	168.997	NA	NA	0.00468643	1.90162:1.90162:1:1:1:1	0.367608(0.448034:0.369225:0.285564)	NA	NA	NA	NA
P. appletonianum & P. hirsutissimum	YN	0.00548268	0.0120923	0.453403	2.07317e-11	51831	10260.4	41570.6	NA	350	122.924	227.076	NA	NA	0.0067911	1.43268:1.43268:1:1:1:1	0.368569(0.449171:0.370029:0.286507)	NA	NA	NA	NA
P. appletonianum & P. insigne	YN	0.00294761	0.00538263	0.547616	0.0002867	51966	10806	41160	NA	179	57.9183	121.082	NA	NA	0.00345396	1.98352:1.98352:1:1:1:1	0.368014(0.448644:0.369419:0.28598)	NA	NA	NA	NA
P. appletonianum & P. malipoense	YN	0.00957501	0.0225981	0.423709	4.94176e-25	51915	12112	39803	NA	647	268.489	378.511	NA	NA	0.0126133	4.34327:4.34327:1:1:1:1	0.368088(0.448284:0.369613:0.286368)	NA	NA	NA	NA
P. appletonianum & P. micranthum	YN	0.0086873	0.0216641	0.401	1.07111e-26	52131	12347	39784	NA	606	262.575	343.425	NA	NA	0.0117608	4.93124:4.93124:1:1:1:1	0.368005(0.448394:0.369447:0.286174)	NA	NA	NA	NA
P. appletonianum & P. parishii	YN	0.00445823	0.00805055	0.55378	9.00282e-06	51927	11019.8	40907.2	NA	270	88.1779	181.822	NA	NA	0.00522058	2.23522:2.23522:1:1:1:1	0.368282(0.448616:0.370473:0.285758)	NA	NA	NA	NA
P. appletonianum & P. purpuratum	YN	0.00103415	0.00302676	0.341668	6.08405e-06	52233	11590.8	40642.2	NA	77	35	42	NA	NA	0.00147632	3.03996:3.03996:1:1:1:1	0.367598(0.448006:0.369308:0.285481)	NA	NA	NA	NA
P. appletonianum & P. tigrinum	YN	0.00430802	0.00652451	0.660282	0.00409161	51990	11244.4	40745.6	NA	248	72.9841	175.016	NA	NA	0.0047874	2.5664:2.5664:1:1:1:1	0.367903(0.448533:0.369253:0.285924)	NA	NA	NA	NA
P. appletonianum & P. venustum	YN	0.00158501	0.00515885	0.307241	1.87965e-10	52089	11403.4	40685.6	NA	123	58.5838	64.4162	NA	NA	0.0023674	2.75199:2.75199:1:1:1:1	0.367506(0.448006:0.36917:0.285342)	NA	NA	NA	NA
P. appletonianum & P. villosum	YN	0.0029967	0.00629654	0.475927	1.66999e-06	51948	10881	41067	NA	191	68.1855	122.815	NA	NA	0.00368788	2.08027:2.08027:1:1:1:1	0.367682(0.448394:0.369003:0.285647)	NA	NA	NA	NA
P. appletonianum & P. wardii	YN	0.00146466	0.0039978	0.366367	9.90431e-07	52119	11795.3	40323.7	NA	106	47	59	NA	NA	0.00203795	3.46947:3.46947:1:1:1:1	0.36733(0.447673:0.368892:0.285425)	NA	NA	NA	NA
P. armeniacum & P. barbigerum	YN	0.00918295	0.0195924	0.468699	1.33133e-17	51141	11658.7	39482.3	NA	585	224.792	360.208	NA	NA	0.011556	3.78406:3.78406:1:1:1:1	0.364899(0.445233:0.366009:0.283456)	NA	NA	NA	NA
P. armeniacum & P. ‘GZSLKY Youyou	YN	0.0111304	0.0246071	0.452324	1.06818e-22	51159	11230	39929	NA	712	270.948	441.052	NA	NA	0.0140887	2.83874:2.83874:1:1:1:1	0.365482(0.444984:0.367118:0.284344)	NA	NA	NA	NA
P. armeniacum & P. bellatulum	YN	0.0143559	0.0271289	0.529174	4.98169e-18	51267	11728.9	39538.1	NA	873	311.142	561.858	NA	NA	0.0172781	4.02436:4.02436:1:1:1:1	0.362644(0.442127:0.364872:0.280933)	NA	NA	NA	NA
P. armeniacum & P. concolor	YN	0.00740638	0.0183385	0.40387	3.05571e-22	51459	11968.6	39490.4	NA	507	216.065	290.935	NA	NA	0.00994903	4.47304:4.47304:1:1:1:1	0.365038(0.445067:0.367118:0.282929)	NA	NA	NA	NA
P. armeniacum & P. dianthum	YN	0.00955783	0.0208145	0.459192	1.70293e-19	51435	11537.7	39897.3	NA	615	236.206	378.794	NA	NA	0.0120829	3.32801:3.32801:1:1:1:1	0.365768(0.445788:0.367811:0.283706)	NA	NA	NA	NA
P. armeniacum & P. emersonii	YN	0.00393169	0.00750153	0.524119	1.68866e-06	51633	12626.6	39006.4	NA	247	94.0893	152.911	NA	NA	0.00480468	6.86201:6.86201:1:1:1:1	0.365556(0.445871:0.366813:0.283983)	NA	NA	NA	NA
P. armeniacum & P. henryanum	YN	0.00999341	0.0204141	0.489535	1.06621e-16	51207	11505.4	39701.6	NA	625	231.018	393.982	NA	NA	0.0123348	3.39098:3.39098:1:1:1:1	0.365214(0.445261:0.366785:0.283595)	NA	NA	NA	NA
P. armeniacum & P. hirsutissimum	YN	0.0114562	0.0251289	0.455899	9.83895e-23	51216	11144	40072	NA	730	274.506	455.494	NA	NA	0.0144312	2.65884:2.65884:1:1:1:1	0.366175(0.446398:0.367589:0.284538)	NA	NA	NA	NA
P. armeniacum & P. insigne	YN	0.00907842	0.0190698	0.476062	1.08927e-16	51333	11682.5	39650.5	NA	577	219.348	357.652	NA	NA	0.0113523	3.73478:3.73478:1:1:1:1	0.36562(0.445871:0.366979:0.284011)	NA	NA	NA	NA
P. armeniacum & P. malipoense	YN	0.00414467	0.00765857	0.541181	4.34708e-06	51591	12320.9	39270.1	NA	256	93.7231	162.277	NA	NA	0.00498386	5.42588:5.42588:1:1:1:1	0.365694(0.445511:0.367173:0.284399)	NA	NA	NA	NA
P. armeniacum & P. micranthum	YN	0.00353514	0.0072611	0.48686	2.81647e-07	51651	12715.5	38935.5	NA	229	91.7285	137.271	NA	NA	0.0044524	7.36549:7.36549:1:1:1:1	0.365611(0.445621:0.367007:0.284205)	NA	NA	NA	NA
P. armeniacum & P. parishii	YN	0.00972697	0.0212456	0.457834	9.2452e-20	51399	11529.1	39869.9	NA	626	240.814	385.186	NA	NA	0.0123107	3.33193:3.33193:1:1:1:1	0.365888(0.445843:0.368033:0.283789)	NA	NA	NA	NA
P. armeniacum & P. purpuratum	YN	0.00822892	0.0200068	0.411306	2.04033e-23	51525	12045.2	39479.8	NA	560	237.042	322.958	NA	NA	0.0109823	4.58374:4.58374:1:1:1:1	0.365204(0.445233:0.366868:0.283512)	NA	NA	NA	NA
P. armeniacum & P. tigrinum	YN	0.0102809	0.0198943	0.516779	1.55419e-14	51327	11760.1	39566.9	NA	634	230.175	403.825	NA	NA	0.0124836	3.95739:3.95739:1:1:1:1	0.365509(0.44576:0.366813:0.283955)	NA	NA	NA	NA
P. armeniacum & P. venustum	YN	0.00822012	0.0209661	0.392068	2.4003e-26	51480	11929.7	39550.3	NA	569	245.805	323.195	NA	NA	0.0111738	4.24987:4.24987:1:1:1:1	0.365112(0.445233:0.36673:0.283373)	NA	NA	NA	NA
P. armeniacum & P. villosum	YN	0.00896379	0.0194757	0.460256	3.12192e-18	51321	11678.2	39642.8	NA	577	223.906	353.094	NA	NA	0.0113558	3.73414:3.73414:1:1:1:1	0.365288(0.445621:0.366563:0.283678)	NA	NA	NA	NA
P. armeniacum & P. wardii	YN	0.00830183	0.0196722	0.422009	3.96523e-22	51417	12043.6	39373.4	NA	558	233.081	324.919	NA	NA	0.0109651	4.62718:4.62718:1:1:1:1	0.364936(0.4449:0.366452:0.283456)	NA	NA	NA	NA
P. barbigerum & P. ‘GZSLKY Youyou	YN	0.00655091	0.0116689	0.561399	3.19569e-07	52062	10404.6	41657.4	NA	392	120.307	271.693	NA	NA	0.00757375	1.53559:1.53559:1:1:1:1	0.368227(0.448644:0.369475:0.286562)	NA	NA	NA	NA
P. barbigerum & P. bellatulum	YN	0.0110977	0.0182071	0.609525	1.92492e-08	51606	11343.7	40262.3	NA	647	203.602	443.398	NA	NA	0.0126605	2.95897:2.95897:1:1:1:1	0.365389(0.445788:0.367229:0.283151)	NA	NA	NA	NA
P. barbigerum & P. concolor	YN	0.00516112	0.0102978	0.501186	1.477e-08	51759	11002.1	40756.9	NA	322	112.383	209.617	NA	NA	0.006253	2.29892:2.29892:1:1:1:1	0.367783(0.448727:0.369475:0.285148)	NA	NA	NA	NA
P. barbigerum & P. dianthum	YN	0.00504919	0.00745988	0.676846	0.00405163	51999	10611.7	41387.3	NA	287	78.7396	208.26	NA	NA	0.00554115	1.75763:1.75763:1:1:1:1	0.368513(0.449448:0.370168:0.285924)	NA	NA	NA	NA
P. barbigerum & P. emersonii	YN	0.00983959	0.0225697	0.435964	2.00897e-23	51900	11953.9	39946.1	NA	655	264.687	390.313	NA	NA	0.0127717	3.9627:3.9627:1:1:1:1	0.368301(0.449531:0.36917:0.286202)	NA	NA	NA	NA
P. barbigerum & P. henryanum	YN	0.00281332	0.00355903	0.790474	0.223912	52113	10336.5	41776.5	NA	154	36.692	117.308	NA	NA	0.00296123	1.48869:1.48869:1:1:1:1	0.367959(0.448921:0.369142:0.285813)	NA	NA	NA	NA
P. barbigerum & P. hirsutissimum	YN	0.00612441	0.0116611	0.525202	2.87404e-08	52080	9955.57	42124.4	NA	372	115.08	256.92	NA	NA	0.00718279	1.16975:1.16975:1:1:1:1	0.36892(0.450058:0.369946:0.286756)	NA	NA	NA	NA
P. barbigerum & P. insigne	YN	0.00177765	0.002578	0.689549	0.080964	52167	10501.2	41665.8	NA	101	27.0214	73.9786	NA	NA	0.00193876	1.63471:1.63471:1:1:1:1	0.368366(0.449531:0.369336:0.286229)	NA	NA	NA	NA
P. barbigerum & P. malipoense	YN	0.0106911	0.0226749	0.471494	5.98944e-20	51738	11776.9	39961.1	NA	686	261.959	424.041	NA	NA	0.0134189	3.62849:3.62849:1:1:1:1	0.36844(0.449171:0.36953:0.286617)	NA	NA	NA	NA
P. barbigerum & P. micranthum	YN	0.00990435	0.0219967	0.450265	1.21125e-21	51891	11966.6	39924.4	NA	651	258.344	392.656	NA	NA	0.012693	3.99822:3.99822:1:1:1:1	0.368356(0.449282:0.369364:0.286423)	NA	NA	NA	NA
P. barbigerum & P. parishii	YN	0.00520518	0.00807611	0.644515	0.000696756	52017	10623.4	41393.6	NA	300	85.2964	214.704	NA	NA	0.00579151	1.76694:1.76694:1:1:1:1	0.368634(0.449504:0.37039:0.286007)	NA	NA	NA	NA
P. barbigerum & P. purpuratum	YN	0.0034352	0.00709767	0.483989	7.83749e-07	51888	11063.9	40824.1	NA	218	78.0871	139.913	NA	NA	0.00421613	2.33546:2.33546:1:1:1:1	0.36795(0.448894:0.369225:0.28573)	NA	NA	NA	NA
P. barbigerum & P. tigrinum	YN	0.00309045	0.00338166	0.913886	0.569434	52116	11345.9	40770.1	NA	164	38.2694	125.731	NA	NA	0.00315385	2.69917:2.69917:1:1:1:1	0.368255(0.44942:0.36917:0.286174)	NA	NA	NA	NA
P. barbigerum & P. venustum	YN	0.00370248	0.00776944	0.476544	9.66128e-08	51861	11038.2	40822.8	NA	236	85.2338	150.766	NA	NA	0.0045681	2.29608:2.29608:1:1:1:1	0.367857(0.448894:0.369087:0.285591)	NA	NA	NA	NA
P. barbigerum & P. villosum	YN	0.00050322	0.000946194	0.531836	0.0711701	52119	10805.5	41313.5	NA	31	10.2174	20.7826	NA	NA	0.000595059	1.96384:1.96384:1:1:1:1	0.368033(0.449282:0.36892:0.285897)	NA	NA	NA	NA
P. barbigerum & P. wardii	YN	0.00358546	0.00668382	0.536439	2.41928e-05	51864	11233.1	40630.9	NA	220	74.6738	145.326	NA	NA	0.00425653	2.57326:2.57326:1:1:1:1	0.367682(0.448561:0.368809:0.285675)	NA	NA	NA	NA
P. ‘GZSLKY Youyou & P. bellatulum	YN	0.0127035	0.021993	0.577617	1.45909e-11	51660	11124.5	40535.5	NA	751	240.486	510.514	NA	NA	0.0147039	2.53386:2.53386:1:1:1:1	0.365972(0.445538:0.368338:0.284039)	NA	NA	NA	NA
P. ‘GZSLKY Youyou & P. concolor	YN	0.007093	0.015576	0.455381	2.40659e-14	51777	10504.8	41272.2	NA	453	161.652	291.348	NA	NA	0.00881407	1.68522:1.68522:1:1:1:1	0.368366(0.448478:0.370584:0.286035)	NA	NA	NA	NA
P. ‘GZSLKY Youyou & P. dianthum	YN	0.00679415	0.0119316	0.569425	5.90916e-07	52044	10272.1	41771.9	NA	404	121.492	282.508	NA	NA	0.00780815	1.41119:1.41119:1:1:1:1	0.369096(0.449199:0.371277:0.286812)	NA	NA	NA	NA
P. ‘GZSLKY Youyou & P. emersonii	YN	0.0115161	0.0272741	0.422237	4.91219e-29	51921	11599.9	40321.1	NA	770	309.32	460.68	NA	NA	0.0150367	3.11664:3.11664:1:1:1:1	0.368883(0.449282:0.370279:0.287089)	NA	NA	NA	NA
P. ‘GZSLKY Youyou & P. henryanum	YN	0.00773882	0.0123824	0.624984	1.63102e-05	52230	10272.9	41957.1	NA	449	125.989	323.011	NA	NA	0.00865215	1.3924:1.3924:1:1:1:1	0.368541(0.448672:0.370251:0.286701)	NA	NA	NA	NA
P. ‘GZSLKY Youyou & P. hirsutissimum	YN	0.00341188	0.0043193	0.789914	0.167361	52200	10343.5	41856.5	NA	187	44.5201	142.48	NA	NA	0.00359168	1.44114:1.44114:1:1:1:1	0.369503(0.449809:0.371055:0.287644)	NA	NA	NA	NA
P. ‘GZSLKY Youyou & P. insigne	YN	0.00639201	0.0107523	0.594481	9.06018e-06	52092	10345.8	41746.2	NA	376	110.304	265.696	NA	NA	0.00725799	1.47498:1.47498:1:1:1:1	0.368948(0.449282:0.370445:0.287117)	NA	NA	NA	NA
P. ‘GZSLKY Youyou & P. malipoense	YN	0.0124826	0.0275094	0.453755	2.27238e-25	51756	11465.2	40290.8	NA	807	308.334	498.666	NA	NA	0.0158114	2.93654:2.93654:1:1:1:1	0.369022(0.448921:0.370639:0.287505)	NA	NA	NA	NA
P. ‘GZSLKY Youyou & P. micranthum	YN	0.0116841	0.0268721	0.434804	3.51159e-27	51909	11594.6	40314.4	NA	772	304.726	467.274	NA	NA	0.0150766	3.10626:3.10626:1:1:1:1	0.368939(0.449032:0.370473:0.287311)	NA	NA	NA	NA
P. ‘GZSLKY Youyou & P. parishii	YN	0.0068755	0.0125293	0.548752	5.04435e-08	52005	10249.4	41755.6	NA	413	127.236	285.764	NA	NA	0.00798979	1.39834:1.39834:1:1:1:1	0.369216(0.449254:0.371499:0.286895)	NA	NA	NA	NA
P. ‘GZSLKY Youyou & P. purpuratum	YN	0.00527433	0.0119761	0.440404	2.3906e-12	51891	10483.6	41407.4	NA	342	124.381	217.619	NA	NA	0.0066283	1.635:1.635:1:1:1:1	0.368532(0.448644:0.370334:0.286617)	NA	NA	NA	NA
P. ‘GZSLKY Youyou & P. tigrinum	YN	0.00768041	0.0114645	0.669928	0.00022486	52092	10748	41344	NA	438	122.102	315.898	NA	NA	0.00846118	1.87564:1.87564:1:1:1:1	0.368837(0.449171:0.370279:0.287061)	NA	NA	NA	NA
P. ‘GZSLKY Youyou & P. venustum	YN	0.00551062	0.0121122	0.454964	1.41976e-11	51876	10479.9	41396.1	NA	353	125.729	227.271	NA	NA	0.00684427	1.62909:1.62909:1:1:1:1	0.36844(0.448644:0.370196:0.286479)	NA	NA	NA	NA
P. ‘GZSLKY Youyou & P. villosum	YN	0.00633929	0.0114678	0.552789	2.78934e-07	52089	10326.2	41762.8	NA	381	117.382	263.618	NA	NA	0.00735598	1.46092:1.46092:1:1:1:1	0.368615(0.449032:0.370029:0.286784)	NA	NA	NA	NA
P. ‘GZSLKY Youyou & P. wardii	YN	0.00539558	0.010798	0.499682	9.346e-09	51867	10726	41141	NA	336	114.827	221.173	NA	NA	0.0065128	1.88191:1.88191:1:1:1:1	0.368264(0.448311:0.369918:0.286562)	NA	NA	NA	NA
P. bellatulum & P. concolor	YN	0.00719248	0.0107245	0.670659	0.000336333	51690	11524.5	40165.5	NA	410	122.574	287.426	NA	NA	0.00797996	3.27002:3.27002:1:1:1:1	0.365528(0.445621:0.368338:0.282624)	NA	NA	NA	NA
P. bellatulum & P. dianthum	YN	0.0110589	0.0172367	0.641589	6.03689e-07	51816	11319.7	40496.3	NA	637	192.549	444.451	NA	NA	0.0124085	2.80936:2.80936:1:1:1:1	0.366258(0.446342:0.369031:0.283401)	NA	NA	NA	NA
P. bellatulum & P. emersonii	YN	0.0149584	0.0300215	0.498255	5.45106e-23	51744	11969.4	39774.6	NA	939	350.349	588.651	NA	NA	0.0184428	4.24431:4.24431:1:1:1:1	0.366046(0.446426:0.368033:0.283678)	NA	NA	NA	NA
P. bellatulum & P. henryanum	YN	0.0114022	0.0174327	0.654069	1.42849e-06	51717	11380.7	40336.3	NA	652	195.696	456.304	NA	NA	0.0127292	2.97312:2.97312:1:1:1:1	0.365704(0.445816:0.368005:0.28329)	NA	NA	NA	NA
P. bellatulum & P. hirsutissimum	YN	0.0118007	0.0203117	0.580982	1.40037e-10	51678	11233.6	40444.4	NA	698	224.559	473.441	NA	NA	0.0136508	2.67504:2.67504:1:1:1:1	0.366665(0.446952:0.368809:0.284233)	NA	NA	NA	NA
P. bellatulum & P. insigne	YN	0.011036	0.0177829	0.620596	8.41046e-08	51711	11336.7	40374.3	NA	641	198.826	442.174	NA	NA	0.0125152	2.9131:2.9131:1:1:1:1	0.36611(0.446426:0.368199:0.283706)	NA	NA	NA	NA
P. bellatulum & P. malipoense	YN	0.015531	0.0300512	0.516816	5.61691e-21	51606	11853.6	39752.4	NA	958	347.343	610.657	NA	NA	0.0188662	4.02363:4.02363:1:1:1:1	0.366184(0.446065:0.368393:0.284094)	NA	NA	NA	NA
P. bellatulum & P. micranthum	YN	0.0149112	0.029409	0.507029	1.1277e-21	51759	11937.9	39821.1	NA	930	342.487	587.513	NA	NA	0.018255	4.14545:4.14545:1:1:1:1	0.366101(0.446176:0.368227:0.2839)	NA	NA	NA	NA
P. bellatulum & P. parishii	YN	0.0112225	0.0178677	0.628091	1.30418e-07	51783	11304	40479	NA	650	199.218	450.782	NA	NA	0.0126732	2.79578:2.79578:1:1:1:1	0.366378(0.446398:0.369253:0.283484)	NA	NA	NA	NA
P. bellatulum & P. purpuratum	YN	0.0109322	0.0191345	0.571333	8.108e-11	51702	11637.7	40064.3	NA	654	219.333	434.667	NA	NA	0.0127784	3.47746:3.47746:1:1:1:1	0.365694(0.445788:0.368088:0.283207)	NA	NA	NA	NA
P. bellatulum & P. tigrinum	YN	0.0122962	0.0186525	0.659226	1.07092e-06	51705	11410.9	40294.1	NA	701	209.748	491.252	NA	NA	0.013699	3.06921:3.06921:1:1:1:1	0.365999(0.446315:0.368033:0.28365)	NA	NA	NA	NA
P. bellatulum & P. venustum	YN	0.0111089	0.0200417	0.55429	4.76437e-12	51657	11557.4	40099.6	NA	670	227.969	442.031	NA	NA	0.0131075	3.31036:3.31036:1:1:1:1	0.365602(0.445788:0.36795:0.283068)	NA	NA	NA	NA
P. bellatulum & P. villosum	YN	0.0109143	0.0181507	0.601315	8.63049e-09	51699	11321.7	40377.3	NA	640	202.632	437.368	NA	NA	0.012499	2.89381:2.89381:1:1:1:1	0.365777(0.446176:0.367783:0.283373)	NA	NA	NA	NA
P. bellatulum & P. wardii	YN	0.0110601	0.0188997	0.585202	5.58588e-10	51672	11631.6	40040.4	NA	656	216.545	439.455	NA	NA	0.0128249	3.45768:3.45768:1:1:1:1	0.365426(0.445455:0.367672:0.283151)	NA	NA	NA	NA
P. concolor & P. dianthum	YN	0.00568656	0.0112838	0.503956	3.97406e-09	52047	10893.8	41153.2	NA	355	121.876	233.124	NA	NA	0.00685811	2.06598:2.06598:1:1:1:1	0.368652(0.449282:0.371277:0.285397)	NA	NA	NA	NA
P. concolor & P. emersonii	YN	0.0084373	0.0210997	0.399878	2.72555e-26	52254	12317.2	39936.8	NA	590	255.078	334.922	NA	NA	0.0114221	4.8483:4.8483:1:1:1:1	0.36844(0.449365:0.370279:0.285675)	NA	NA	NA	NA
P. concolor & P. henryanum	YN	0.00601759	0.0111171	0.541293	8.96052e-08	51825	10818.9	41006.1	NA	365	119.244	245.756	NA	NA	0.00708215	2.04327:2.04327:1:1:1:1	0.368098(0.448755:0.370251:0.285286)	NA	NA	NA	NA
P. concolor & P. hirsutissimum	YN	0.00750769	0.0163283	0.459796	7.37423e-15	51828	10498.5	41329.5	NA	478	169.276	308.724	NA	NA	0.00929443	1.65674:1.65674:1:1:1:1	0.369059(0.449892:0.371055:0.286229)	NA	NA	NA	NA
P. concolor & P. insigne	YN	0.00490425	0.00969501	0.505853	4.58933e-08	51969	10979.5	40989.5	NA	306	105.644	200.356	NA	NA	0.0059164	2.20857:2.20857:1:1:1:1	0.368504(0.449365:0.370445:0.285702)	NA	NA	NA	NA
P. concolor & P. malipoense	YN	0.00896578	0.0213451	0.42004	3.26313e-24	52056	12145.9	39910.1	NA	610	254.435	355.565	NA	NA	0.0118541	4.44418:4.44418:1:1:1:1	0.368578(0.449004:0.370639:0.286091)	NA	NA	NA	NA
P. concolor & P. micranthum	YN	0.00795902	0.0202639	0.392769	5.18765e-26	52272	12373.8	39898.2	NA	562	246.276	315.724	NA	NA	0.0108718	5.03008:5.03008:1:1:1:1	0.368495(0.449115:0.370473:0.285897)	NA	NA	NA	NA
P. concolor & P. parishii	YN	0.00572761	0.0116196	0.492925	9.6847e-10	52014	10880.5	41133.5	NA	360	125.312	234.688	NA	NA	0.00696012	2.05908:2.05908:1:1:1:1	0.368772(0.449337:0.371499:0.285481)	NA	NA	NA	NA
P. concolor & P. purpuratum	YN	0.00419476	0.0105185	0.398799	1.06257e-13	52197	11634.6	40562.4	NA	291	121.339	169.661	NA	NA	0.0056043	3.16792:3.16792:1:1:1:1	0.368088(0.448727:0.370334:0.285203)	NA	NA	NA	NA
P. concolor & P. tigrinum	YN	0.00629302	0.0107624	0.584722	2.81497e-06	51948	11233.8	40714.2	NA	375	119.881	255.119	NA	NA	0.00725953	2.58815:2.58815:1:1:1:1	0.368393(0.449254:0.370279:0.285647)	NA	NA	NA	NA
P. concolor & P. venustum	YN	0.00408584	0.0111714	0.36574	2.15981e-16	52152	11654.6	40497.4	NA	294	129	165	NA	NA	0.00566929	3.21138:3.21138:1:1:1:1	0.367996(0.448727:0.370196:0.285065)	NA	NA	NA	NA
P. concolor & P. villosum	YN	0.00490526	0.010369	0.473072	8.8199e-10	51942	10940.5	41001.5	NA	313	112.544	200.456	NA	NA	0.00605609	2.16895:2.16895:1:1:1:1	0.368171(0.449115:0.370029:0.28537)	NA	NA	NA	NA
P. concolor & P. wardii	YN	0.00424735	0.00991722	0.42828	1.63134e-11	52101	11666.3	40434.7	NA	286	114.759	171.241	NA	NA	0.00551693	3.24758:3.24758:1:1:1:1	0.36782(0.448394:0.369918:0.285148)	NA	NA	NA	NA
P. dianthum & P. emersonii	YN	0.0102153	0.0234351	0.435899	2.29011e-24	52182	11894.8	40287.2	NA	682	273.402	408.598	NA	NA	0.0132287	3.62522:3.62522:1:1:1:1	0.36917(0.450086:0.370972:0.286451)	NA	NA	NA	NA
P. dianthum & P. henryanum	YN	0.00549842	0.00720458	0.763184	0.0440466	52086	10456	41630	NA	303	74.947	228.053	NA	NA	0.00584092	1.58465:1.58465:1:1:1:1	0.368828(0.449476:0.370944:0.286063)	NA	NA	NA	NA
P. dianthum & P. hirsutissimum	YN	0.00676677	0.0122868	0.550733	1.13615e-07	52140	10250.9	41889.1	NA	407	124.835	282.165	NA	NA	0.00785203	1.36667:1.36667:1:1:1:1	0.369789(0.450613:0.371749:0.287006)	NA	NA	NA	NA
P. dianthum & P. insigne	YN	0.00467596	0.00686509	0.681122	0.00708397	52179	10495.9	41683.1	NA	266	71.7048	194.295	NA	NA	0.0051163	1.60543:1.60543:1:1:1:1	0.369234(0.450086:0.371139:0.286479)	NA	NA	NA	NA
P. dianthum & P. malipoense	YN	0.010789	0.0236515	0.456166	4.19421e-22	52026	11762.7	40263.3	NA	704	272.847	431.153	NA	NA	0.0136971	3.42258:3.42258:1:1:1:1	0.369308(0.449725:0.371333:0.286867)	NA	NA	NA	NA
P. dianthum & P. micranthum	YN	0.0103182	0.0232622	0.443561	1.88665e-23	52179	11888.3	40290.7	NA	684	271.275	412.725	NA	NA	0.0132673	3.61254:3.61254:1:1:1:1	0.369225(0.449836:0.371166:0.286673)	NA	NA	NA	NA
P. dianthum & P. parishii	YN	0.000150917	0.000615054	0.245372	0.00904008	52437	10967.6	41469.4	NA	13	6.74226	6.25774	NA	NA	0.000247995	2.04906:2.04906:1:1:1:1	0.369503(0.450058:0.372192:0.286257)	NA	NA	NA	NA
P. dianthum & P. purpuratum	YN	0.00449395	0.00824906	0.544783	3.89199e-06	52152	11122.5	41029.5	NA	275	91.1758	183.824	NA	NA	0.0052948	2.31471:2.31471:1:1:1:1	0.368819(0.449448:0.371028:0.28598)	NA	NA	NA	NA
P. dianthum & P. tigrinum	YN	0.00580018	0.00763047	0.760133	0.0378364	52176	10797.9	41378.1	NA	321	81.9402	239.06	NA	NA	0.00617896	1.92654:1.92654:1:1:1:1	0.369124(0.449975:0.370972:0.286423)	NA	NA	NA	NA
P. dianthum & P. venustum	YN	0.00472242	0.00879749	0.536791	1.6046e-06	52137	11059.2	41077.8	NA	290	96.632	193.368	NA	NA	0.00558682	2.22607:2.22607:1:1:1:1	0.368726(0.449448:0.370889:0.285841)	NA	NA	NA	NA
P. dianthum & P. villosum	YN	0.00481112	0.00716842	0.671155	0.00416457	52179	10602	41577	NA	275	75.6178	199.382	NA	NA	0.00529009	1.71214:1.71214:1:1:1:1	0.368902(0.449836:0.370723:0.286146)	NA	NA	NA	NA
P. dianthum & P. wardii	YN	0.00471558	0.00770938	0.611667	0.000177247	52059	11236.8	40822.2	NA	278	86.1133	191.887	NA	NA	0.00536178	2.48791:2.48791:1:1:1:1	0.36855(0.449115:0.370612:0.285924)	NA	NA	NA	NA
P. emersonii & P. henryanum	YN	0.0105587	0.0233023	0.453119	2.19891e-22	51960	11838.3	40121.7	NA	691	270.51	420.49	NA	NA	0.0134621	3.63931:3.63931:1:1:1:1	0.368615(0.449559:0.369946:0.28634)	NA	NA	NA	NA
P. emersonii & P. hirsutissimum	YN	0.0119239	0.0279493	0.426626	4.88598e-29	51969	11516.4	40452.6	NA	793	314.577	478.423	NA	NA	0.0154751	2.92128:2.92128:1:1:1:1	0.369576(0.450696:0.37075:0.287283)	NA	NA	NA	NA
P. emersonii & P. insigne	YN	0.00962314	0.0216689	0.444099	5.45943e-22	52107	12033.5	40073.5	NA	639	256.014	382.986	NA	NA	0.012405	4.04551:4.04551:1:1:1:1	0.369022(0.450169:0.37014:0.286756)	NA	NA	NA	NA
P. emersonii & P. malipoense	YN	0.00245652	0.00439677	0.558709	0.0012154	52242	11864.9	40377.1	NA	151	51.9778	99.0222	NA	NA	0.00289718	3.52752:3.52752:1:1:1:1	0.369096(0.449809:0.370334:0.287144)	NA	NA	NA	NA
P. emersonii & P. micranthum	YN	0.00158094	0.00351947	0.449199	8.84913e-05	52458	12520.5	39937.5	NA	107	43.9325	63.0675	NA	NA	0.00204362	5.26264:5.26264:1:1:1:1	0.369013(0.44992:0.370168:0.28695)	NA	NA	NA	NA
P. emersonii & P. parishii	YN	0.0103247	0.0236052	0.437389	2.29092e-24	52158	11893.6	40264.4	NA	688	275.296	412.704	NA	NA	0.013353	3.64132:3.64132:1:1:1:1	0.36929(0.450141:0.371194:0.286534)	NA	NA	NA	NA
P. emersonii & P. purpuratum	YN	0.00905759	0.0230044	0.393732	3.21383e-29	52326	12328.2	39997.8	NA	638	278.079	359.921	NA	NA	0.0123435	4.74464:4.74464:1:1:1:1	0.368606(0.449531:0.370029:0.286257)	NA	NA	NA	NA
P. emersonii & P. tigrinum	YN	0.0109246	0.0225593	0.484261	3.96835e-19	52080	12085.8	39994.2	NA	701	267.481	433.519	NA	NA	0.0136246	4.2335:4.2335:1:1:1:1	0.368911(0.450058:0.369974:0.286701)	NA	NA	NA	NA
P. emersonii & P. venustum	YN	0.00911915	0.0238151	0.382914	3.22555e-31	52293	12207.7	40085.3	NA	648	284.85	363.15	NA	NA	0.0125499	4.3758:4.3758:1:1:1:1	0.368513(0.449531:0.369891:0.286118)	NA	NA	NA	NA
P. emersonii & P. villosum	YN	0.00958547	0.0223904	0.428107	3.08624e-24	52074	11983	40091	NA	645	263.33	381.67	NA	NA	0.0125321	3.93757:3.93757:1:1:1:1	0.368689(0.44992:0.369724:0.286423)	NA	NA	NA	NA
P. emersonii & P. wardii	YN	0.00912448	0.0227263	0.401494	7.69868e-28	52224	12300	39924	NA	636	274.113	361.887	NA	NA	0.012328	4.69788:4.69788:1:1:1:1	0.368338(0.449199:0.369613:0.286202)	NA	NA	NA	NA
P. henryanum & P. hirsutissimum	YN	0.00681491	0.010727	0.635302	0.000131547	52128	9951.88	42176.1	NA	392	105.899	286.101	NA	NA	0.00756178	1.15595:1.15595:1:1:1:1	0.369234(0.450086:0.370723:0.286895)	NA	NA	NA	NA
P. henryanum & P. insigne	YN	0.000810506	0.00151293	0.535719	0.0355172	52200	11005	41195	NA	50	16.6296	33.3704	NA	NA	0.000958595	2.17342:2.17342:1:1:1:1	0.36868(0.449559:0.370113:0.286368)	NA	NA	NA	NA
P. henryanum & P. malipoense	YN	0.01145	0.0234241	0.488813	4.24335e-19	51804	11676.4	40127.6	NA	724	268.184	455.816	NA	NA	0.0141489	3.36823:3.36823:1:1:1:1	0.368754(0.449199:0.370307:0.286756)	NA	NA	NA	NA
P. henryanum & P. micranthum	YN	0.0106857	0.022765	0.46939	2.12582e-20	51957	11850.2	40106.8	NA	690	264.643	425.357	NA	NA	0.0134407	3.66762:3.66762:1:1:1:1	0.368671(0.44931:0.37014:0.286562)	NA	NA	NA	NA
P. henryanum & P. parishii	YN	0.00565839	0.00784295	0.721462	0.01353	52047	10461	41586	NA	316	81.5858	234.414	NA	NA	0.00609747	1.59625:1.59625:1:1:1:1	0.368948(0.449531:0.371166:0.286146)	NA	NA	NA	NA
P. henryanum & P. purpuratum	YN	0.00423806	0.00746113	0.568019	5.02949e-05	51945	10803.7	41141.3	NA	254	80.1381	173.862	NA	NA	0.00490841	1.9875:1.9875:1:1:1:1	0.368264(0.448921:0.370002:0.285869)	NA	NA	NA	NA
P. henryanum & P. tigrinum	YN	0.00209804	0.00232192	0.903578	0.652348	52194	11940	40254	NA	112	27.6695	84.3305	NA	NA	0.00214925	3.83051:3.83051:1:1:1:1	0.368569(0.449448:0.369946:0.286312)	NA	NA	NA	NA
P. henryanum & P. venustum	YN	0.00452426	0.00806108	0.561247	1.70522e-05	51915	10812.3	41102.7	NA	272	86.6074	185.393	NA	NA	0.00526087	1.99373:1.99373:1:1:1:1	0.368171(0.448921:0.369863:0.28573)	NA	NA	NA	NA
P. henryanum & P. villosum	YN	0.00232621	0.00307903	0.755502	0.15205	52155	10494	41661	NA	129	32.2396	96.7604	NA	NA	0.00247769	1.62855:1.62855:1:1:1:1	0.368347(0.44931:0.369697:0.286035)	NA	NA	NA	NA
P. henryanum & P. wardii	YN	0.00438718	0.00695386	0.630899	0.00117711	51921	10975.2	40945.8	NA	255	75.8944	179.106	NA	NA	0.00492973	2.19117:2.19117:1:1:1:1	0.367996(0.448589:0.369586:0.285813)	NA	NA	NA	NA
P. hirsutissimum & P. insigne	YN	0.00605013	0.0106101	0.570223	2.5983e-06	52200	9882.45	42317.5	NA	359	104.022	254.978	NA	NA	0.00691342	1.09428:1.09428:1:1:1:1	0.369641(0.450696:0.370917:0.287311)	NA	NA	NA	NA
P. hirsutissimum & P. malipoense	YN	0.0125668	0.0279342	0.449871	4.94087e-26	51807	11418.2	40388.8	NA	815	311.776	503.224	NA	NA	0.0159537	2.81912:2.81912:1:1:1:1	0.369715(0.450336:0.371111:0.287699)	NA	NA	NA	NA
P. hirsutissimum & P. micranthum	YN	0.0120556	0.0274797	0.438709	4.81143e-27	51960	11518.6	40441.4	NA	793	309.466	483.534	NA	NA	0.0154748	2.92627:2.92627:1:1:1:1	0.369632(0.450446:0.370944:0.287505)	NA	NA	NA	NA
P. hirsutissimum & P. parishii	YN	0.00689174	0.0129548	0.531983	9.95918e-09	52152	10253.2	41898.8	NA	419	131.581	287.419	NA	NA	0.00808375	1.36749:1.36749:1:1:1:1	0.369909(0.450668:0.37197:0.287089)	NA	NA	NA	NA
P. hirsutissimum & P. purpuratum	YN	0.00575201	0.0127077	0.45264	3.63916e-12	51954	10404.3	41549.7	NA	369	130.934	238.066	NA	NA	0.00714496	1.53955:1.53955:1:1:1:1	0.369225(0.450058:0.370806:0.286812)	NA	NA	NA	NA
P. hirsutissimum & P. tigrinum	YN	0.00733996	0.0111889	0.656002	0.000168924	52143	10331.2	41811.8	NA	420	114.618	305.382	NA	NA	0.00810257	1.45702:1.45702:1:1:1:1	0.36953(0.450585:0.37075:0.287255)	NA	NA	NA	NA
P. hirsutissimum & P. venustum	YN	0.00593508	0.0129546	0.458143	4.05924e-12	51951	10398.7	41552.3	NA	379	133.371	245.629	NA	NA	0.00734013	1.53165:1.53165:1:1:1:1	0.369133(0.450058:0.370667:0.286673)	NA	NA	NA	NA
P. hirsutissimum & P. villosum	YN	0.0059244	0.0115323	0.513723	1.5068e-08	52143	9816.39	42326.6	NA	362	112.245	249.755	NA	NA	0.00698013	1.05899:1.05899:1:1:1:1	0.369308(0.450446:0.370501:0.286978)	NA	NA	NA	NA
P. hirsutissimum & P. wardii	YN	0.00582564	0.0116064	0.501934	2.7141e-09	51930	10643.8	41286.2	NA	362	122.425	239.575	NA	NA	0.00701049	1.7701:1.7701:1:1:1:1	0.368957(0.449725:0.37039:0.286756)	NA	NA	NA	NA
P. insigne & P. malipoense	YN	0.0105661	0.022079	0.478558	4.6466e-19	51930	11836.4	40093.6	NA	677	256.504	420.496	NA	NA	0.0131902	3.666:3.666:1:1:1:1	0.369161(0.449809:0.370501:0.287172)	NA	NA	NA	NA
P. insigne & P. micranthum	YN	0.0097138	0.021093	0.460522	5.08367e-20	52098	12051.9	40046.1	NA	636	249.691	386.309	NA	NA	0.0123462	4.09684:4.09684:1:1:1:1	0.369077(0.44992:0.370334:0.286978)	NA	NA	NA	NA
P. insigne & P. parishii	YN	0.0047102	0.00720025	0.654172	0.00231	52197	10502.9	41694.1	NA	271	75.2356	195.764	NA	NA	0.00521124	1.61025:1.61025:1:1:1:1	0.369355(0.450141:0.37136:0.286562)	NA	NA	NA	NA
P. insigne & P. purpuratum	YN	0.00311853	0.00596849	0.522499	3.98725e-05	52086	10929.4	41156.6	NA	193	64.922	128.078	NA	NA	0.00371655	2.10481:2.10481:1:1:1:1	0.368671(0.449531:0.370196:0.286285)	NA	NA	NA	NA
P. insigne & P. tigrinum	YN	0.00152422	0.00161821	0.941918	0.695637	52431	12530.6	39900.4	NA	81	20.2498	60.7502	NA	NA	0.00154669	5.4876:5.4876:1:1:1:1	0.368976(0.450058:0.37014:0.286728)	NA	NA	NA	NA
P. insigne & P. venustum	YN	0.00340465	0.00655162	0.519664	1.2857e-05	52056	10951.9	41104.1	NA	211	71.3773	139.623	NA	NA	0.00406673	2.12864:2.12864:1:1:1:1	0.368578(0.449531:0.370057:0.286146)	NA	NA	NA	NA
P. insigne & P. villosum	YN	0.00177368	0.00287925	0.616023	0.0244632	52398	10142.2	42255.8	NA	104	29.1413	74.8587	NA	NA	0.00198768	1.28531:1.28531:1:1:1:1	0.368754(0.44992:0.369891:0.286451)	NA	NA	NA	NA
P. insigne & P. wardii	YN	0.00326084	0.00548242	0.594782	0.00111852	52065	11160.9	40904.1	NA	194	60.9123	133.088	NA	NA	0.00373707	2.40034:2.40034:1:1:1:1	0.368403(0.449199:0.36978:0.286229)	NA	NA	NA	NA
P. malipoense & P. micranthum	YN	0.00208322	0.00371117	0.561338	0.00205964	52260	11907.8	40352.2	NA	128	44.0562	83.9438	NA	NA	0.00245416	3.61444:3.61444:1:1:1:1	0.369151(0.449559:0.370529:0.287366)	NA	NA	NA	NA
P. malipoense & P. parishii	YN	0.0109591	0.0240682	0.455338	9.13839e-23	51990	11759.4	40230.6	NA	715	277.458	437.542	NA	NA	0.0139242	3.43795:3.43795:1:1:1:1	0.369429(0.449781:0.371555:0.28695)	NA	NA	NA	NA
P. malipoense & P. purpuratum	YN	0.00967085	0.0229027	0.422259	1.56598e-25	52122	12165.6	39956.4	NA	657	273.244	383.756	NA	NA	0.0127592	4.38317:4.38317:1:1:1:1	0.368745(0.449171:0.37039:0.286673)	NA	NA	NA	NA
P. malipoense & P. tigrinum	YN	0.0117344	0.0228858	0.51274	6.31061e-17	51924	11909.2	40014.8	NA	733	267.313	465.687	NA	NA	0.0142921	3.86868:3.86868:1:1:1:1	0.36905(0.449698:0.370334:0.287117)	NA	NA	NA	NA
P. malipoense & P. venustum	YN	0.00968284	0.0239871	0.403668	9.50142e-29	52077	12043.6	40033.4	NA	668	283.022	384.978	NA	NA	0.0129909	4.05423:4.05423:1:1:1:1	0.368652(0.449171:0.370251:0.286534)	NA	NA	NA	NA
P. malipoense & P. villosum	YN	0.0104637	0.0225855	0.463294	7.695e-21	51918	11779.4	40138.6	NA	678	261.074	416.926	NA	NA	0.013214	3.54586:3.54586:1:1:1:1	0.368828(0.449559:0.370085:0.286839)	NA	NA	NA	NA
P. malipoense & P. wardii	YN	0.00974118	0.0228715	0.425909	4.75714e-25	52014	12141.5	39872.5	NA	658	272.291	385.709	NA	NA	0.0128062	4.35773:4.35773:1:1:1:1	0.368477(0.448838:0.369974:0.286617)	NA	NA	NA	NA
P. micranthum & P. parishii	YN	0.0103673	0.0233815	0.443398	2.4806e-23	52149	11890.5	40258.5	NA	687	272.66	414.34	NA	NA	0.0133347	3.63772:3.63772:1:1:1:1	0.369345(0.449892:0.371388:0.286756)	NA	NA	NA	NA
P. micranthum & P. purpuratum	YN	0.00879311	0.022199	0.396103	2.74276e-28	52338	12398.6	39939.4	NA	619	270.049	348.951	NA	NA	0.0119689	4.97108:4.97108:1:1:1:1	0.368661(0.449282:0.370224:0.286479)	NA	NA	NA	NA
P. micranthum & P. tigrinum	YN	0.0110783	0.0221936	0.499168	1.2895e-17	52077	12109.1	39967.9	NA	703	263.712	439.288	NA	NA	0.0136629	4.3008:4.3008:1:1:1:1	0.368966(0.449809:0.370168:0.286923)	NA	NA	NA	NA
P. micranthum & P. venustum	YN	0.00888204	0.0230086	0.386032	5.86993e-30	52293	12270.8	40022.2	NA	630	276.803	353.197	NA	NA	0.0121969	4.56363:4.56363:1:1:1:1	0.368569(0.449282:0.370085:0.28634)	NA	NA	NA	NA
P. micranthum & P. villosum	YN	0.00970943	0.0218798	0.443762	4.17359e-22	52071	11985.5	40085.5	NA	644	257.473	386.527	NA	NA	0.0125108	3.94474:3.94474:1:1:1:1	0.368745(0.44967:0.369918:0.286645)	NA	NA	NA	NA
P. micranthum & P. wardii	YN	0.00889266	0.0219024	0.406013	2.0487e-26	52230	12368.3	39861.7	NA	618	265.815	352.185	NA	NA	0.0119734	4.91733:4.91733:1:1:1:1	0.368393(0.448949:0.369808:0.286423)	NA	NA	NA	NA
P. parishii & P. purpuratum	YN	0.00453663	0.00846421	0.535978	2.23273e-06	52122	11132.5	40989.5	NA	279	93.6169	185.383	NA	NA	0.00537551	2.33854:2.33854:1:1:1:1	0.368939(0.449504:0.37125:0.286063)	NA	NA	NA	NA
P. parishii & P. tigrinum	YN	0.00596294	0.00824926	0.722846	0.00985948	52131	10791.6	41339.4	NA	334	88.4891	245.511	NA	NA	0.00643623	1.93095:1.93095:1:1:1:1	0.369244(0.450031:0.371194:0.286507)	NA	NA	NA	NA
P. parishii & P. venustum	YN	0.00476839	0.00890146	0.535686	8.9891e-07	52107	11094.2	41012.8	NA	293	98.065	194.935	NA	NA	0.00564837	2.28252:2.28252:1:1:1:1	0.368846(0.449504:0.371111:0.285924)	NA	NA	NA	NA
P. parishii & P. villosum	YN	0.00497174	0.00779669	0.637673	0.000691752	52134	10602.9	41531.1	NA	288	82.212	205.788	NA	NA	0.00554627	1.72306:1.72306:1:1:1:1	0.369022(0.449892:0.370944:0.286229)	NA	NA	NA	NA
P. parishii & P. wardii	YN	0.00475462	0.00803768	0.591542	6.07509e-05	52026	11215.9	40810.1	NA	283	89.5878	193.412	NA	NA	0.00546239	2.46912:2.46912:1:1:1:1	0.368671(0.449171:0.370834:0.286007)	NA	NA	NA	NA
P. purpuratum & P. tigrinum	YN	0.00447387	0.0070127	0.637966	0.00119083	52110	11372.3	40737.7	NA	261	79.3005	181.7	NA	NA	0.00502793	2.73389:2.73389:1:1:1:1	0.36856(0.44942:0.370029:0.286229)	NA	NA	NA	NA
P. purpuratum & P. venustum	YN	0.00175058	0.00558211	0.313605	7.7974e-11	52290	11443	40847	NA	135	63.5797	71.4203	NA	NA	0.00258906	2.75534:2.75534:1:1:1:1	0.368162(0.448894:0.369946:0.285647)	NA	NA	NA	NA
P. purpuratum & P. villosum	YN	0.00319259	0.00686483	0.465065	3.09002e-07	52068	11015	41053	NA	206	75.218	130.782	NA	NA	0.00396946	2.22135:2.22135:1:1:1:1	0.368338(0.449282:0.36978:0.285952)	NA	NA	NA	NA
P. purpuratum & P. wardii	YN	0.00168601	0.00457044	0.368895	1.77668e-07	52239	11860.2	40378.8	NA	122	54	68	NA	NA	0.00234088	3.56701:3.56701:1:1:1:1	0.367987(0.448561:0.369669:0.28573)	NA	NA	NA	NA
P. tigrinum & P. venustum	YN	0.00481138	0.00762144	0.631295	0.000616934	52038	11316	40722	NA	281	85.7133	195.287	NA	NA	0.00542244	2.65675:2.65675:1:1:1:1	0.368467(0.44942:0.369891:0.286091)	NA	NA	NA	NA
P. tigrinum & P. villosum	YN	0.00305823	0.00361164	0.846771	0.343072	52392	11104.3	41287.7	NA	166	39.9954	126.005	NA	NA	0.00317552	2.26488:2.26488:1:1:1:1	0.368643(0.449809:0.369724:0.286396)	NA	NA	NA	NA
P. tigrinum & P. wardii	YN	0.00461738	0.00659557	0.700072	0.00873241	52044	11473.4	40570.6	NA	262	75.2593	186.741	NA	NA	0.00505348	2.91326:2.91326:1:1:1:1	0.368292(0.449088:0.369613:0.286174)	NA	NA	NA	NA
P. venustum & P. villosum	YN	0.00346024	0.00752237	0.459993	6.25045e-08	52041	11013.5	41027.5	NA	224	82.3683	141.632	NA	NA	0.00431991	2.21502:2.21502:1:1:1:1	0.368245(0.449282:0.369641:0.285813)	NA	NA	NA	NA
P. venustum & P. wardii	YN	0.000866438	0.00287782	0.301075	1.54986e-06	52263	11843.3	40419.7	NA	69	34	35	NA	NA	0.00132224	3.50825:3.50825:1:1:1:1	0.367894(0.448561:0.36953:0.285591)	NA	NA	NA	NA
P. villosum & P. wardii	YN	0.0032901	0.00646598	0.508832	7.86231e-06	52047	11154.8	40892.2	NA	206	71.7611	134.239	NA	NA	0.00397076	2.40143:2.40143:1:1:1:1	0.36807(0.448949:0.369364:0.285897)	NA	NA	NA	NA
