# Supplementary material for: Comparative Analyses of Chloroplast Genomes Provide Comprehensive Insights into the Adaptive Evolution of Paphiopedilum (Orchidaceae)
Source: MDPI journal article supplement (doi:10.3390/horticulturae8050391), 2022-04-28
Supplement: s1 [file s1 › Table S6.xlsx]

## Sheet: Table S6
Table S6. The variation and selectivity statistics of the given species.
Species	Number of individuals	Accession Number	SNP number	InDel number	Ka	Ks	Ka/Ks	P-value (Fisher)	Locations	Reference
Paphiopedilum appletonianum	2	MN587755	94	109	0.000210203	0.00053321	0.394221	0.0399565	National Orchid Conservation & Research Center of Shenzhen	Guo et al. 2021 [12]
		MN587756							National Orchid Conservation & Research Center of Shenzhen	Guo et al. 2021 [12]
Paphiopedilum armeniacum	2	LC085347	86	21	0.001083	0.002163	0.500956	0.002147	National Orchid Conservation & Research Center of Shenzhen	Guo et al. 2021 [12]
		NC_026779							National Orchid Conservation & Research Center of Shenzhen	Guo et al. 2021 [12]
Paphiopedilum barbigerum	3	MN315106	725	203	0.001799	0.003549	0.518053	0.021592	Guizhou Province	In this study
		MN587758							National Orchid Conservation & Research Center of Shenzhen	Guo et al. 2021 [12]
		NC_050870							Libo County,Guizhou Province	Li et al. 2019 [107]
Paphiopedilum bellatulum	2	MZ150829	1958	327	0.001083	0.002163	0.500956	0.0021466	/	/
		MN315107							Guizhou Province	In this study
Paphiopedilum concolor	2	MH191340	2919	251	0.051088	0.084953	0.601372	2.92e-29	National Orchid Conservation & Research Center of Shenzhen	Guo et al. 2021 [12]
		MN587764							Kunming,Yunnan Province	Guo et al. 2021 [12]
Paphiopedilum dianthum	2	MN587767	2	12	8.76e-05	6.54e-05	1.33902	0.752436	National Orchid Conservation & Research Center of Shenzhen	Guo et al. 2021 [12]
		NC_036958							Guizhou Province	Hou et al. 2018 [108]
Paphiopedilum emersonii	2	MN587769	236	164	0.00076	0.001388	0.547945	0.01652	National Orchid Conservation & Research Center of Shenzhen	Guo et al. 2021 [12]
		NC_053544							/	/
Paphiopedilum henryanum	4	MN587780	247	116	0.00019	0.000231	0.982414	0.44653	National Orchid Conservation & Research Center of Shenzhen	Guo et al. 2021 [12]
		MN587781							National Orchid Conservation & Research Center of Shenzhen	Guo et al. 2021 [12]
		MN315108							Guizhou Province	In this study
		OK514750							/	/
Paphiopedilum hirsutissimum	5	MN315109	264	112	0.000662	0.001233	0.476862	0.086167	Guizhou Province	In this study
		MN587782							National Orchid Conservation & Research Center of Shenzhen	Guo et al. 2021 [12]
		MN587783							National Orchid Conservation & Research Center of Shenzhen	Guo et al. 2021 [12]
		MW794130							Shandong Provincial Academy of Forestry	Sun et al. 2022 [9]			Characterization of the Complete Chloroplast Genomes of Six Paphiopedilum species
		NC_050871							Guangxi Province	Zhao et al. 2019 [109]
Paphiopedilum micranthum	2	MN587791	58	16	0.000281	0.000411	0.685506	0.325887	National Orchid Conservation & Research Center of Shenzhen	Guo et al. 2021 [12]
		NC_045278							/	/
Paphiopedilum parishii	2	MN587822	1	3	0.001533	0.002832	0.541235	0.001158	National Orchid Conservation & Research Center of Shenzhen	Guo et al. 2021 [12]
		MW528213							/	/
Paphiopedilum tigrinum	2	MN587804	1	10	0.001079	0.00113	0.955344	0.709965	/	/
		NC_062049							/	/
Paphiopedilum villosum	4	MN587810	1287	262	0.001627	0.00189	0.870764	0.283812	National Orchid Conservation & Research Center of Shenzhen	Guo et al. 2021 [12]
		MN587811							National Orchid Conservation & Research Center of Shenzhen	Guo et al. 2021 [12]
		MN587812							National Orchid Conservation & Research Center of Shenzhen	Guo et al. 2021 [12]
		MN587813							National Orchid Conservation & Research Center of Shenzhen	Guo et al. 2021 [12]
Paphiopedilum wardii	2	MH191341	5632	708	0.033093	0.053685	0.616438	6.29e-16	Kunming,Yunnan Province	/
		MN587760							National Orchid Conservation & Research Center of Shenzhen	Guo et al. 2021 [12]
